# Supplementary material for: Synthesis and photophysical properties of donor-substituted phenyl-phosphachromones as potential TADF materials
Source: Royal Society of Chemistry journal article supplement (doi:10.1039/d1qo00121c), 2021-01-01
Supplement: d1qo00121c1.pdf [file d1qo00121c1.pdf]

## Supporting Information

### **Synthesis and Photophysical Properties of Donor-substituted Phenyl-phosphachromones as Potential TADF Material.**

*Shuangshuang Xu, Haiyang Huang,\* Chengxiong Yuan, Fen Liu, Haixin Ding, Qiang Xiao\**

Key Laboratory of Organic Chemistry in Jiangxi Province, Institute of Organic Chemistry, Jiangxi Science & Technology Normal University, Nanchang 330013, China

huanghaiyang1209@163.com; xiaoqiang@tsinghua.org.cn

## Contents

|                                                                                                                            |           |
|----------------------------------------------------------------------------------------------------------------------------|-----------|
| <b>Synthesis and Photophysical Properties of Donor-substituted Phenyl-phosphachromones as Potential TADF Material.....</b> | <b>s1</b> |
| 1. Materials and Instruments .....                                                                                         | s3        |
| 2. Detailed syntheses of (di)bromphenyl phosphachromones.....                                                              | s3        |
| 3. Detailed synthesis of amino substituted phenyl-phosphachromones. ....                                                   | s3        |
| 4. The analytical and spectral characterization data.....                                                                  | s3        |
| 5. The photoelectric properties.....                                                                                       | s10       |
| 6. The calculation data. ....                                                                                              | s12       |
| 7. Copies of <sup>31</sup> P NMR, <sup>1</sup> H NMR, <sup>13</sup> C NMR Spectra.....                                     | s14       |
| 8. X-ray crystal structures of <b>4e</b> , <b>4i</b> and <b>4k</b> . ....                                                  | s35       |

## 1. Materials and Instruments

All reactions were routinely performed under an inert atmosphere of nitrogen by using standard Schlenk techniques and dry deoxygenated solvents. Dry toluene was obtained by distillation from  $P_4O_{10}$ . Aluminum oxide neutral for TLC (100 - 200 mesh) were purchased from Kermel Co. Ltd. And silica gel (200 - 300 mesh) purchased from Qingdao Hai Yang Chemical Industry Co. Ltd. was used for chromatographic separations. NMR spectra (400 MHz/100 MHz) were recorded on an Advance DPX spectrometer (Bruker, Billerica, MA, USA) at room temperature with Chloroform-*d* or DMSO-*d* as solvent. Tetramethylsilane (TMS) was used as an internal reference. Fluorescence data were measured with an Agilent F-4600. The sample film were measured Edinburgh FLS980 spectrometer.

## 2. Detailed syntheses of (di)bromophenyl phosphachromones.

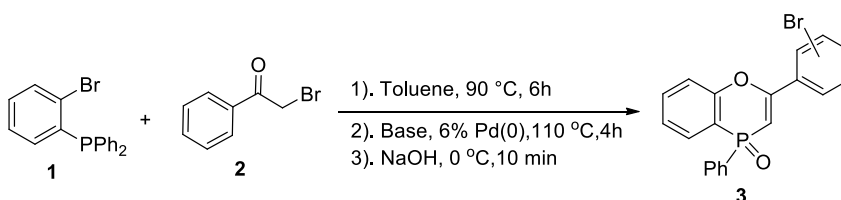

Compounds **1** (2 mmol) and **2** (2.1 mmol) were dissolved in toluene (8 mL) in a Schlenk bottle under argon gas atmosphere. After stirring at 90 °C in oil bath for 6 h, washed twice with  $Et_2O$ . To dissolve the solid in  $CH_2Cl_2$  (5 mL),  $tBuOK$  (2.5 mmol) was added and the mixture was stirred at room temperature for 5 min, and then corresponding phosphonium ylides were obtained. The crude product is filtered through column chromatography (petroleum ether : ethyl acetate = 1 : 1 (v/v)) to remove impurities, and the product is obtained by column chromatography ( $CH_2Cl_2$  :  $CH_3OH$  = 15 : 1 (v/v)) to afford the corresponding phosphonium ylides. The phosphonium ylides were dissolved in toluene (8 mL) in a Schlenk bottle under argon gas atmosphere. While  $Pd(Ph_3P)_4$  (0.12 mmol) as catalyst added directly at room temperature, heterocyclic phosphoniums were precipitated from mixture under reflux at 110 °C for 4 h. To a toluene solution of heterocyclic phosphoniums, aqueous solution of NaOH (10M, 2.0 mL) was added at -10 – 0 °C. After the reaction mixture was stirred for 20 min at this temperature, water (20 mL) was added to the resulting mixture. The organic layer was separated, and the aqueous layer was extracted with  $CH_2Cl_2$  (5 mL  $\times$  2). All combined organic solutions were dried with anhydrous  $Na_2SO_4$ , and the solvent was removed under reduced pressure. The residue was purified by column chromatography (petroleum ether : ethyl acetate = 1 : 2 (v/v)) to afford the corresponding products **3**.<sup>[1]</sup>

## 3. Detailed synthesis of amino substituted phenyl-phosphachromones.

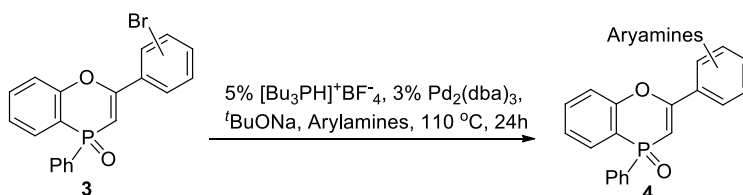

Compounds **3** (1 mmol), Aryamines (1.1 mmol),  $tBuONa$  (1.15 mmol),  $[Bu_3PH]^+BF_4^-$  (0.05 mmol) and  $Pd_2(dba)_3$  (0.03 mmol) were dissolved in toluene (2 mL) in a Schlenk bottle under argon gas atmosphere. The reaction was refluxed at 110 °C for 24 h. The organic layer was separated, and the aqueous layer was extracted with  $CH_2Cl_2$  (5 mL  $\times$  2). All combined organic solutions were dried with anhydrous  $Mg_2SO_4$ , and the solvent was removed under reduced pressure. The residue was purified by column chromatography ( $CH_2Cl_2$  : ethyl acetate = 20 : 1 (v/v)) to afford the corresponding products **4**.

## 4. The analytical and spectral characterization data.

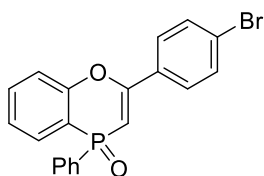

#### 4'-bromophenyl phosphachromones

Reaction condition as general procedure for synthesis of compounds **3**: The reaction of compounds **1** (2 mmol) and 2-bromo-1-(3,5-dibromophenyl)ethanone (2.1 mmol), then a flash column chromatography (petroleum ether : ethyl acetate = 1 : 2 (v/v)) to afford the corresponding products 4'-bromophenyl phosphachromone (651 mg, 82% yield).<sup>[1]</sup>

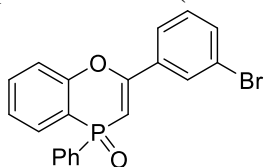

#### 3'-bromophenyl phosphachromones

Reaction condition as general procedure for synthesis of compounds **3**: The reaction of compounds **1** (2 mmol) and 2-bromo-1-(3,5-dibromophenyl)ethanone (2.1 mmol), then a flash column chromatography (petroleum ether : ethyl acetate = 1 : 2 (v/v)) to afford the corresponding products 3'-bromophenyl phosphachromone (635 mg, 80% yield).<sup>[1]</sup>

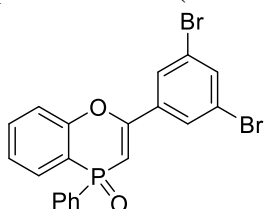

#### 3',5'-dibromophenyl phosphachromones

Reaction condition as general procedure for synthesis of compounds **3**: The reaction of compounds **1** (2 mmol) and 2-bromo-1-(3,5-dibromophenyl)ethanone (2.1 mmol), then a flash column chromatography (petroleum ether : ethyl acetate = 1 : 2 (v/v)) to afford the corresponding products 3',5'-dibromophenyl phosphachromone (809 mg, 85% yield); <sup>31</sup>P NMR (162 MHz, CDCl<sub>3</sub>) δ -1.95 (s) ; <sup>1</sup>H NMR (400 MHz, CDCl<sub>3</sub>) δ 7.90 (d, *J* = 1.1 Hz, 2H), 7.76 (s, 1H), 7.72- 7.67 (m, 2H), 7.65 – 7.59 (m, 2H), 7.52 – 7.42 (m, 4H), 7.29 (t, *J* = 7.5 Hz, 1H), 6.07 (d, *J* = 1.0 Hz, 1H); <sup>13</sup>C NMR (101 MHz, CDCl<sub>3</sub>) δ 158.34 (s, C), 155.37 (d, *J*<sub>C-P</sub> = 3.4 Hz, C), 136.86 (d, *J*<sub>C-P</sub> = 10.2 Hz, C), 136.17 (s, CH), 133.78 (d, *J*<sub>C-P</sub> = 60.6 Hz, C), 133.61 (s, CH), 132.03 (d, *J*<sub>C-P</sub> = 2.0 Hz, CH), 131.92 (d, *J*<sub>C-P</sub> = 11.0 Hz, 2CH), 131.09 (d, *J*<sub>C-P</sub> = 5.7 Hz, CH), 128.60 (d, *J*<sub>C-P</sub> = 13.3 Hz, 2CH), 128.08 (s, 2CH), 125.58 (d, *J*<sub>C-P</sub> = 10.6 Hz, CH), 123.45 (s, 2C), 118.50 (d, *J*<sub>C-P</sub> = 5.3 Hz, CH), 115.87 (d, *J*<sub>C-P</sub> = 103.9 Hz, C), 93.90 (d, *J*<sub>C-P</sub> = 103.1 Hz, CH). HRMS Calcd. For C<sub>20</sub>H<sub>14</sub>Br<sub>2</sub>O<sub>2</sub>P<sup>+</sup> [M + H<sup>+</sup>]<sup>+</sup>, 474.9093. Found: 474.9090.

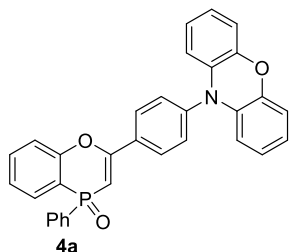

Reaction condition as general procedure for synthesis of compounds **4**: The reaction of compound **3** (396 mg, 1 mmol) and Phenoxazine(PO) (219 mg, 1.1 mmol), then a flash column chromatography (CH<sub>2</sub>Cl<sub>2</sub> : ethyl acetate = 20 : 1 (v/v)) afforded Yellow solid **4a** (424 mg, 85% yield); <sup>31</sup>P NMR (162 MHz, Chloroform-*d*) δ -1.45; <sup>1</sup>H NMR (400 MHz, Chloroform-*d*) δ 8.09 (d, *J* = 8.2 Hz, 2H), 7.79 – 7.73 (m, 2H), 7.72– 7.67 (m, 1H), 7.65 – 7.60 (m, 1H), 7.54 – 7.44 (m, 6H), 7.31 (t, *J* = 7.5 Hz, 1H), 6.73 – 6.65 (m, 4H), 6.63– 6.59 (m, 2H), 6.16 (d, *J* = 2.0 Hz, 1H), 5.96 (dd, *J* = 7.9, 1.5 Hz, 2H); <sup>13</sup>C

NMR (101 MHz, Chloroform-*d*)  $\delta$  160.49 (s, C), 155.60 (d,  $J_{C-P}$  = 3.2 Hz, C), 143.95 (s, 2C), 141.60 (s, C), 134.79 (d,  $J_{C-P}$  = 15.2 Hz, C), 133.86 (s, 2C), 133.73 (s, C), 133.50 (s, CH), 131.98 (d,  $J_{C-P}$  = 4.0 Hz, 2CH), 131.88 (s, CH), 131.35 (s, 2CH), 131.10 (d,  $J_{C-P}$  = 3.0 Hz, CH), 129.04 (s, 2CH), 128.55 (d,  $J_{C-P}$  = 13.1 Hz, 2CH), 125.38 (d,  $J_{C-P}$  = 10.6 Hz, CH), 123.32 (s, 2CH), 121.76 (s, 2CH), 118.45 (d,  $J_{C-P}$  = 5.5 Hz, CH), 116.54 (d,  $J_{C-P}$  = 51.5 Hz, C), 115.68 (s, 2CH), 113.27 (s, 2CH), 92.71 (d,  $J_{C-P}$  = 104.5 Hz, CH). HRMS Calcd. For  $C_{32}H_{23}NO_3P^+$   $[M + H]^+$ , 500.1410. Found: 500.1411.

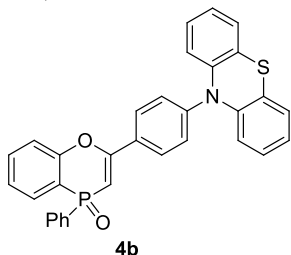

Reaction condition as general procedure for synthesis of compounds **4**: The reaction of compound **3** (396 mg, 1 mmol) and Phenothiazine(PT) (237 mg, 1.1 mmol), then a flash column chromatography ( $CH_2Cl_2$  : ethyl acetate = 20 : 1 (v/v)) afforded Red solid **4b** (412 mg, 80% yield);  $^{31}P$  NMR (162 MHz, Chloroform-*d*)  $\delta$  -1.32;  $^1H$  NMR (400 MHz, Chloroform-*d*)  $\delta$  7.96 – 7.94 (m, 2H), 7.78– 7.72 (m, 2H), 7.70 – 7.65 (m, 1H), 7.59 (t,  $J$  = 8.7 Hz, 1H), 7.50 – 7.39 (m, 4H), 7.37 – 7.35 (m, 2H), 7.28 (t,  $J$  = 40.4 Hz, 1H), 7.20 – 7.17 (m, 2H), 7.06 – 7.01 (m, 2H), 6.98– 6.94 (m, 2H), 6.66 (dd,  $J$  = 8.1, 1.4 Hz, 2H), 6.08 (d,  $J$  = 2.1 Hz, 1H);  $^{13}C$  NMR (101 MHz, Chloroform-*d*)  $\delta$  160.89 (s, C), 155.61 (d,  $J_{C-P}$  = 3.0 Hz, C), 145.25 (s, C), 142.95 (s, 2C), 134.54 (d,  $J_{C-P}$  = 120.1 Hz, C), 133.37 (s, CH), 131.92 (d,  $J_{C-P}$  = 10.1 Hz, 2CH), 131.78 (d,  $J_{C-P}$  = 3.0 Hz, CH), 131.05 (d,  $J_{C-P}$  = 5.1 Hz, CH), 130.64 (d,  $J_{C-P}$  = 10.1 Hz, C), 128.51 (d,  $J_{C-P}$  = 13.1 Hz, 2CH), 128.29 (s, 2CH), 127.62 (s, 2CH), 127.07 (s, 2CH), 125.52 (s, 2CH), 125.50 (s, 2C), 125.22 (d,  $J_{C-P}$  = 10.1 Hz, CH), 124.05 (s, 2CH), 120.03 (s, 2CH), 118.43 (d,  $J_{C-P}$  = 5.5 Hz, CH), 116.10 (d,  $J_{C-P}$  = 104.0 Hz, C), 91.32 (d,  $J_{C-P}$  = 105.6 Hz, CH). HRMS Calcd. For  $C_{32}H_{23}NO_2PS^+$   $[M + H]^+$ , 516.1182. Found: 516.1182.

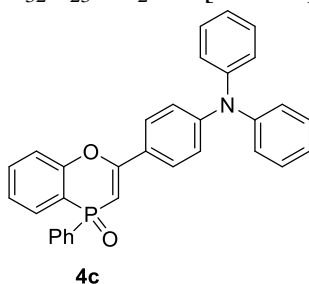

Reaction condition as general procedure for synthesis of compounds **4**: The reaction of compound **3** (396 mg, 1 mmol) and Diphenylamine(DPA) (201 mg, 1.1 mmol), then a flash column chromatography ( $CH_2Cl_2$  : ethyl acetate = 20 : 1 (v/v)) afforded Yellow solid **4c** (407 mg, 84% yield);  $^{31}P$  NMR (162 MHz, Chloroform-*d*)  $\delta$  -0.92;  $^1H$  NMR (400 MHz, Chloroform-*d*)  $\delta$  7.77 – 7.69 (m, 4H), 7.67 – 7.62 (m, 1H), 7.56 (t,  $J$  = 7.6 Hz, 1H), 7.51 – 7.42 (m, 3H), 7.39 – 7.36 (m, 1H), 7.33 – 7.23 (m, 7H), 7.16 – 7.07 (m, 6H), 5.94 (d,  $J$  = 2.0 Hz, 1H);  $^{13}C$  NMR (101 MHz, Chloroform-*d*)  $\delta$  161.43 (s, C), 155.64 (d,  $J_{C-P}$  = 3.0 Hz, C), 150.40 (s, C), 146.83 (s, 2C), 134.86 (d,  $J_{C-P}$  = 120.3 Hz, C), 133.15 (s, CH), 131.93 (d,  $J_{C-P}$  = 10.8 Hz, 2CH), 131.58 (d,  $J_{C-P}$  = 3.0 Hz, CH), 130.98 (d,  $J_{C-P}$  = 5.4 Hz, CH), 129.53 (s, 4CH), 128.39 (d,  $J_{C-P}$  = 13.1 Hz, 2CH), 127.24 (s, 2CH), 125.85 (d,  $J_{C-P}$  = 10.1 Hz, C), 125.47 (s, 4CH), 124.97 (d,  $J_{C-P}$  = 10.5 Hz, CH), 124.15 (s, 2CH), 121.25 (s, 2CH), 118.35 (d,  $J_{C-P}$  = 6.1 Hz, CH), 116.21 (d,  $J_{C-P}$  = 102.3 Hz, C), 89.29 (d,  $J_{C-P}$  = 107.1 Hz, CH). HRMS Calcd. For  $C_{32}H_{24}NO_2PNa^+$   $[M + Na]^+$ , 508.1437. Found: 508.1432.

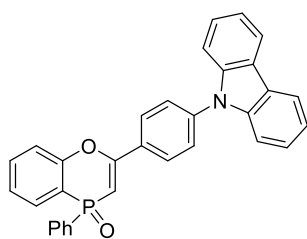

**4d**

Reaction condition as general procedure for synthesis of compounds **4**: The reaction of compound **3** (396 mg, 1 mmol) and Carbazole(CZ) (199 mg, 1.1 mmol), then a flash column chromatography ( $\text{CH}_2\text{Cl}_2$  : ethyl acetate = 20 : 1 (v/v)) afforded Yellow solid **4d** (396 mg, 82% yield);  $^{31}\text{P}$  NMR (162 MHz, Chloroform-*d*)  $\delta$  -1.32;  $^1\text{H}$  NMR (400 MHz, Chloroform-*d*)  $\delta$  8.17 – 8.10 (m, 4H), 7.82 – 7.77 (m, 2H), 7.72 (d,  $J$  = 8.4 Hz, 3H), 7.63 (t,  $J$  = 7.9 Hz, 1H), 7.51 – 7.41 (m, 8H), 7.32 (t,  $J$  = 7.2 Hz, 3H), 6.19 (s, 1H);  $^{13}\text{C}$  NMR (101 MHz, Chloroform-*d*)  $\delta$  160.67 (s, C), 155.64 (d,  $J_{\text{C-P}}$  = 3.0 Hz, C), 140.39 (s, 2C), 140.24 (s, C), 134.44 (d,  $J_{\text{C-P}}$  = 120.3 Hz, C), 133.46 (s, CH), 132.24 (d,  $J_{\text{C-P}}$  = 9.1 Hz, C), 131.95 (d,  $J_{\text{C-P}}$  = 11.0 Hz, 2CH), 131.86 (d,  $J_{\text{C-P}}$  = 2.9 Hz, CH), 131.12 (d,  $J_{\text{C-P}}$  = 5.5 Hz, CH), 128.56 (d,  $J_{\text{C-P}}$  = 13.2 Hz, 2CH), 127.91 (s, 2CH), 126.96 (s, 2CH), 126.19 (s, 2CH), 125.34 (d,  $J_{\text{C-P}}$  = 10.5 Hz, CH), 123.73 (s, 2C), 120.50 (s, 2CH), 120.48 (s, 2CH), 118.47 (d,  $J_{\text{C-P}}$  = 2.0 Hz, CH), 116.11 (d,  $J_{\text{C-P}}$  = 104.0 Hz, C), 109.74 (s, 2CH), 92.15 (d,  $J_{\text{C-P}}$  = 105.1 Hz, CH). HRMS Calcd. For  $\text{C}_{32}\text{H}_{23}\text{NO}_2\text{P}^+$  [ $\text{M} + \text{H}^+$ ] $^+$ , 484.1461. Found: 484.1460.

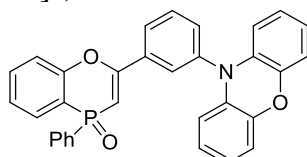

**4e**

Reaction condition as general procedure for synthesis of compounds **4**: The reaction of compound **3** (396 mg, 1 mmol) and Phenoxazine(PO) (219 mg, 1.1 mmol), then a flash column chromatography ( $\text{CH}_2\text{Cl}_2$  : ethyl acetate = 20 : 1 (v/v)) afforded Yellow solid **4e** (404 mg, 81% yield);  $^{31}\text{P}$  NMR (162 MHz, Chloroform-*d*)  $\delta$  -1.64;  $^1\text{H}$  NMR (400 MHz, Chloroform-*d*)  $\delta$  7.74 (d,  $J$  = 8.0 Hz, 1H), 7.68 (d,  $J$  = 2.1 Hz, 1H), 7.55 – 7.41 (m, 4H), 7.38 – 7.34 (m, 1H), 7.30 – 7.18 (m, 5H), 7.07 – 7.03 (m, 1H), 6.50 – 6.37 (m, 6H), 5.93 (d,  $J$  = 1.9 Hz, 1H), 5.72 – 5.70 (m, 2H);  $^{13}\text{C}$  NMR (101 MHz, Chloroform-*d*)  $\delta$  160.04 (s, C), 155.54 (d,  $J_{\text{C-P}}$  = 3.0 Hz, C), 143.94 (s, 2C), 139.76 (s, C), 136.89 (d,  $J_{\text{C-P}}$  = 10.1 Hz, C), 134.43 (d,  $J_{\text{C-P}}$  = 78.8 Hz, C), 134.04 (s, 2C), 133.62 (s, CH), 133.47 (s, CH), 131.95 (d,  $J_{\text{C-P}}$  = 10.1 Hz, 2CH), 131.90 (s, CH), 131.66 (s, CH), 131.05 (d,  $J_{\text{C-P}}$  = 5.1 Hz, CH), 128.87 (s, CH), 128.56 (d,  $J_{\text{C-P}}$  = 13.1 Hz, 2CH), 126.26 (s, CH), 125.38 (d,  $J_{\text{C-P}}$  = 10.1 Hz, CH), 123.37 (s, 2CH), 121.71 (s, 2CH), 118.56 (d,  $J_{\text{C-P}}$  = 5.1 Hz, CH), 116.02 (d,  $J_{\text{C-P}}$  = 104.0 Hz, C), 115.66 (s, 2CH), 113.23 (s, 2CH), 92.76 (d,  $J_{\text{C-P}}$  = 104.3 Hz, CH). HRMS Calcd. For  $\text{C}_{32}\text{H}_{23}\text{NO}_3\text{P}^+$  [ $\text{M} + \text{H}^+$ ] $^+$ , 500.1410. Found: 500.1413.

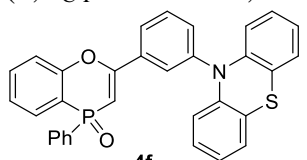

**4f**

Reaction condition as general procedure for synthesis of compounds **4**: The reaction of compound **3** (396 mg, 1 mmol) and Phenothiazine(PT) (237 mg, 1.1 mmol), then a flash column chromatography ( $\text{CH}_2\text{Cl}_2$  : ethyl acetate = 20 : 1 (v/v)) afforded Red solid **4f** (391 mg, 76% yield);  $^{31}\text{P}$  NMR (162 MHz, Chloroform-*d*)  $\delta$  -1.59;  $^1\text{H}$  NMR (400 MHz, Chloroform-*d*)  $\delta$  7.94 – 7.92 (m, 2H), 7.77 – 7.63 (m, 4H), 7.61 – 7.56 (m, 1H), 7.54 – 7.39 (m, 5H), 7.29 – 7.25 (m, 1H), 7.09 – 7.06 (m, 2H), 6.93 – 6.84 (m, 4H), 6.30 – 6.28 (m, 2H), 6.14 (d,  $J$  = 2.0 Hz, 1H);  $^{13}\text{C}$  NMR (101 MHz, Chloroform-*d*)  $\delta$  160.26 (s, C), 155.56 (d,  $J_{\text{C-P}}$  = 3.1 Hz, C), 143.81 (s, C), 142.03 (s, C), 136.54 (d,  $J_{\text{C-P}}$  = 10.4 Hz, C), 134.28 (d,  $J_{\text{C-P}}$  = 120.0 Hz, C), 133.44 (s, CH), 132.67 (s, CH), 131.95 (d,  $J_{\text{C-P}}$  = 11.1 Hz, 2CH), 131.87 (s, CH), 131.84 (s, C), 131.09 (s, CH), 131.05 (d,  $J_{\text{C-P}}$  = 5.9 Hz, CH), 128.54 (d,  $J_{\text{C-P}}$  = 13.1 Hz, 2CH), 127.79 (s, CH), 127.06 (s, 2CH), 127.01 (s, 2CH), 125.52 (s, CH), 125.34 (d,  $J_{\text{C-P}}$  = 10.5 Hz, CH), 123.04 (s, 2CH),

121.38 (s, 2C), 118.54 (d,  $J_{C-P} = 5.4$  Hz, CH), 116.77(s, 2CH), 116.04 (d,  $J_{C-P} = 103.5$  Hz, C), 92.66 (d,  $J_{C-P} = 104.2$  Hz, CH). HRMS Calcd. For  $C_{32}H_{23}NO_2PS^+ [M + H^+]^+$ , 516.1182. Found: 516.1180.

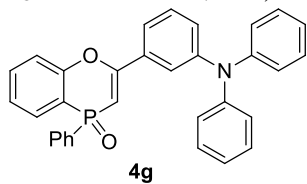

Reaction condition as general procedure for synthesis of compounds **4**: The reaction of compound **3** (396 mg, 1 mmol) and Diphenylamine(DPA) (201 mg, 1.1 mmol), then a flash column chromatography ( $CH_2Cl_2$  : ethyl acetate = 20 : 1 (v/v)) afforded White solid **4g** (388 mg, 80% yield);  $^{31}P$  NMR (162 MHz, Chloroform-*d*)  $\delta$  -1.17;  $^1H$  NMR (400 MHz, Chloroform-*d*)  $\delta$  7.54 – 7.48 (m, 2H), 7.45 – 7.40 (m, 1H), 7.37 – 7.32 (m, 2H), 7.31 – 7.21 (m, 4H), 7.14 – 7.02 (m, 7H), 6.98 (dd,  $J = 7.9, 2.3$  Hz, 1H), 6.91 (d,  $J = 7.9$  Hz, 4H), 6.86 (t,  $J = 7.4$  Hz, 2H), 5.73 (d,  $J = 2.3$  Hz, 1H);  $^{13}C$  NMR (101 MHz, Chloroform-*d*)  $\delta$  161.43 (s, C), 155.55 (d,  $J_{C-P} = 3.0$  Hz, C), 148.50 (s, C), 147.33 (s, 2C), 135.01 (d,  $J_{C-P} = 17.2$  Hz, C), 134.35 (d,  $J_{C-P} = 92.9$  Hz, C), 133.24 (s, CH), 131.96 (d,  $J_{C-P} = 10.8$  Hz, 2CH), 131.71 (d,  $J_{C-P} = 3.1$  Hz, CH), 130.96 (d,  $J_{C-P} = 6.1$  Hz, CH), 129.61 (s, CH), 129.48 (s, 4CH), 128.46 (d,  $J_{C-P} = 13.1$  Hz, 2CH), 125.79 (s, CH), 125.11 (d,  $J_{C-P} = 10.1$  Hz, CH), 124.55 (s, 4CH), 123.46 (s, 2CH), 120.98 (s, CH), 120.05 (s, CH), 118.47 (d,  $J_{C-P} = 6.1$  Hz, CH), 116.04 (d,  $J_{C-P} = 102.9$  Hz, C), 91.70 (d,  $J_{C-P} = 105.3$  Hz, CH). HRMS Calcd. For  $C_{32}H_{24}NO_2PNa^+ [M + Na^+]^+$ , 508.1437. Found: 508.1434.

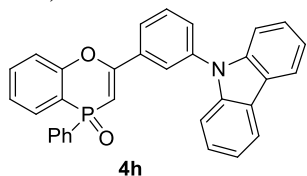

Reaction condition as general procedure for synthesis of compounds **4**: The reaction of compound **3** (396 mg, 1 mmol) and Carbazole(CZ) (199 mg, 1.1 mmol), then a flash column chromatography ( $CH_2Cl_2$  : ethyl acetate = 20 : 1 (v/v)) afforded Yellow solid **4h** (377 mg, 78% yield);  $^{31}P$  NMR (162 MHz, Chloroform-*d*)  $\delta$  -1.42;  $^1H$  NMR (400 MHz, Chloroform-*d*)  $\delta$  7.98 – 7.94 (m, 3H), 7.77 – 7.75 (m, 1H), 7.61 – 7.56 (m, 2H), 7.54 – 7.47 (m, 3H), 7.38 – 7.23 (m, 8H), 7.20 – 7.16 (m, 1H), 7.15 – 7.11 (m, 2H), 7.09 – 7.05 (m, 1H), 6.02 (d,  $J = 2.0$  Hz, 1H);  $^{13}C$  NMR (101 MHz, Chloroform-*d*)  $\delta$  160.46 (s, C), 155.58 (d,  $J_{C-P} = 3.3$  Hz, C), 140.71 (s, 2C), 138.50 (s, C), 135.69 (d,  $J_{C-P} = 10.1$  Hz, C), 134.25 (d,  $J_{C-P} = 120.3$  Hz, C), 133.53 (s, CH), 131.99 (d,  $J_{C-P} = 5.6$  Hz, 2CH), 131.96 (s, CH), 131.08 (d,  $J_{C-P} = 5.6$  Hz, CH), 130.54 (s, CH), 129.49 (s, CH), 128.59 (d,  $J_{C-P} = 4.0$  Hz, 2CH), 126.27 (s, 2CH), 125.43 (d,  $J_{C-P} = 10.6$  Hz, CH), 125.06 (d,  $J_{C-P} = 29.6$  Hz, 2CH), 123.60 (s, 2C), 120.53 (s, 2CH), 120.41 (s, 2CH), 118.57 (d,  $J_{C-P} = 5.3$  Hz, CH), 116.05 (d,  $J_{C-P} = 103.3$  Hz, C), 109.62 (s, 2CH), 92.78 (d,  $J_{C-P} = 104.3$  Hz, CH). HRMS Calcd. For  $C_{32}H_{23}NO_2P^+ [M + H^+]^+$ , 484.1461. Found: 484.1460.

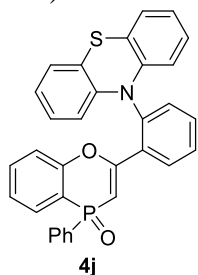

Reaction condition as general procedure for synthesis of compounds **4**: The reaction of compound **3** (396 mg, 1 mmol) and Phenothiazine(PT) (237 mg, 1.1 mmol), then a flash column chromatography ( $CH_2Cl_2$  : ethyl acetate = 20 : 1 (v/v)) afforded Yellow solid **4j** (160 mg, 30% yield);  $^{31}P$  NMR (162 MHz, Chloroform-*d*)  $\delta$  -1.38;  $^1H$  NMR (400 MHz, Chloroform-*d*)  $\delta$  7.87 (d,  $J = 7.6$  Hz, 1H), 7.75 (t,  $J = 7.6$  Hz, 1H), 7.63 (t,  $J = 7.6$  Hz, 1H), 7.55 – 7.49 (m, 2H), 7.39 – 7.20 (m, 7H), 7.14 (t,  $J = 7.5$  Hz, 1H), 6.88 – 6.79 (m, 5H), 6.25 – 6.16 (m, 3H), 5.68 (d,  $J = 3.8$  Hz, 1H);  $^{13}C$  NMR (101 MHz, Chloroform-*d*)  $\delta$  161.97 (s, C), 155.58 (d,  $J_{C-P} = 1.5$  Hz, C), 143.44 (s, 2C), 138.42 (s, C), 136.72 (d,  $J_{C-P} = 10.0$  Hz, C), 134.24 (d,  $J_{C-P} = 60.10$  Hz, C), 133.77 (s, CH), 132.84 (s, CH), 132.02 (s, CH), 131.87 (s, CH), 131.79 (d,  $J_{C-P} = 5.1$  Hz, 2CH), 131.42 (d,  $J_{C-P} = 1.5$  Hz, CH), 130.56 (d,  $J_{C-P} = 5.6$  Hz, CH), 129.39 (s, CH),

128.32 (d,  $J_{C-P} = 13.2$  Hz, 2CH), 126.99 (s, 2CH), 126.46 (s, 2CH), 124.91 (d,  $J_{C-P} = 10.5$  Hz, CH), 122.50 (s, 2CH), 119.64 (s, 2C), 118.25 (d,  $J_{C-P} = 5.2$  Hz, CH), 115.66 (d,  $J_{C-P} = 51.51$  Hz, C), 115.49 (s, 2CH), 96.28 (d,  $J_{C-P} = 101.6$  Hz, CH). HRMS Calcd. For  $C_{32}H_{23}NO_2PS^+$   $[M + H]^+$ , 516.1182. Found: 516.1181.

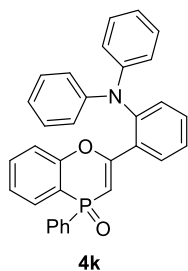

Reaction condition as general procedure for synthesis of compounds **4**: The reaction of compound **3** (396 mg, 1 mmol) and Diphenylamine(DPA) (201 mg, 1.1 mmol), then a flash column chromatography ( $CH_2Cl_2$  : ethyl acetate = 20 : 1 (v/v)) afforded White solid **4k** (184 mg, 38% yield);  $^{31}P$  NMR (162 MHz, Chloroform-*d*)  $\delta$  -1.30;  $^1H$  NMR (400 MHz, Chloroform-*d*)  $\delta$  7.64 (dd,  $J = 7.7, 1.7$  Hz, 1H), 7.49 – 7.37 (m, 4H), 7.36 – 7.29 (m, 3H), 7.24 – 7.10 (m, 8H), 6.98 – 6.93 (m, 7H), 5.63 (d,  $J = 3.9$  Hz, 1H);  $^{13}C$  NMR (101 MHz, Chloroform-*d*)  $\delta$  162.89 (s, C), 155.74 (d,  $J_{C-P} = 3.3$  Hz, C), 147.26 (s, 2C), 145.32 (s, C), 133.83 (d,  $J_{C-P} = 65.7$  Hz, C), 133.28 (s, CH), 132.83 (s, C), 132.21 (d,  $J_{C-P} = 11.2$  Hz, 2CH), 131.86 (d,  $J_{C-P} = 20.5$  Hz, 2CH), 131.43 (d,  $J_{C-P} = 2.9$  Hz, CH), 130.77 (d,  $J_{C-P} = 5.8$  Hz, CH), 130.45 (s, CH), 129.02 (s, 4CH), 128.16 (d,  $J_{C-P} = 13.1$  Hz, 2CH), 125.72 (s, CH), 124.60 (d,  $J_{C-P} = 10.5$  Hz, CH), 122.47 (s, 4CH), 121.97 (s, 2CH), 118.77 (d,  $J_{C-P} = 5.4$  Hz, CH), 115.74 (d,  $J_{C-P} = 102.9$  Hz, C), 94.93 (d,  $J_{C-P} = 102.7$  Hz, CH). HRMS Calcd. For  $C_{32}H_{24}NO_2PNa^+$   $[M + Na]^+$ , 508.1437. Found: 508.1432.

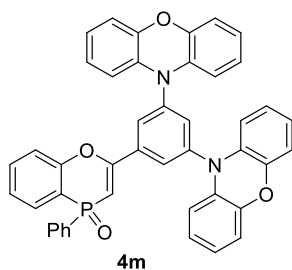

Reaction condition as general procedure for synthesis of compounds **4**: The reaction of compound **3** (476 mg, 1 mmol) and Phenoxazine(PO) (438 mg, 2.2 mmol), then a flash column chromatography ( $CH_2Cl_2$  : ethyl acetate = 20 : 1 (v/v)) afforded Yellow solid **4m** (551 mg, 81% yield);  $^{31}P$  NMR (162 MHz, Chloroform-*d*)  $\delta$  -1.84;  $^1H$  NMR (400 MHz, Chloroform-*d*)  $\delta$  8.00 (d,  $J = 2.0$  Hz, 2H), 7.75 – 7.69 (m, 2H), 7.67 – 7.57 (m, 3H), 7.54 – 7.42 (m, 4H), 7.28 (t,  $J = 8$  Hz, 1H), 6.75 – 6.66 (m, 12H), 6.18 (s, 1H), 6.05 – 6.03 (m, 4H);  $^{13}C$  NMR (101 MHz, Chloroform-*d*)  $\delta$  158.77 (s, C), 155.44 (d,  $J_{C-P} = 3.3$  Hz, C), 144.01 (s, 4C), 142.68 (s, 2C), 139.70 (d,  $J_{C-P} = 10.1$  Hz, C), 136.46 (s, CH), 133.82 (d,  $J_{C-P} = 60.1$  Hz, C), 133.64 (s, CH), 133.59 (s, 4C), 132.05 (s, CH), 131.97 (d,  $J_{C-P} = 11.0$  Hz, 2CH), 131.11 (d,  $J_{C-P} = 5.6$  Hz, CH), 129.03 (s, 2CH), 128.61 (d,  $J_{C-P} = 13.3$  Hz, 2CH), 125.60 (d,  $J_{C-P} = 10.6$  Hz, CH), 123.48 (s, 4CH), 122.18 (s, 4CH), 118.60 (d,  $J_{C-P} = 5.4$  Hz, CH), 115.97 (s, 4CH), 115.88 (d,  $J_{C-P} = 52.0$  Hz, C), 113.14 (s, 4CH), 93.77 (d,  $J_{C-P} = 103.1$  Hz, CH). HRMS Calcd. For  $C_{44}H_{29}N_2O_4PNa^+$   $[M + Na]^+$ , 703.1757. Found: 703.1760.

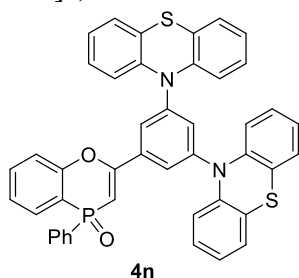

Reaction condition as general procedure for synthesis of compounds **4**: The reaction of compound **3** (476 mg, 1 mmol) and Phenothiazine(PT) (474 mg, 2.2 mmol), then a flash column chromatography



(CH<sub>2</sub>Cl<sub>2</sub> : ethyl acetate = 20 : 1 (v/v)) afforded Red solid **4n** (527 mg, 74% yield); <sup>31</sup>P NMR (162 MHz, Chloroform-*d*) δ -1.39; <sup>1</sup>H NMR (400 MHz, Chloroform-*d*) δ 7.77 (d, *J* = 2.1 Hz, 2H), 7.72 (dd, *J* = 13.5, 7.3 Hz, 2H), 7.65 (dd, *J* = 12.8, 7.7 Hz, 1H), 7.59 (t, *J* = 7.9 Hz, 1H), 7.52 – 7.44 (m, 3H), 7.36 – 7.33 (m, 2H), 7.28 (t, *J* = 0.51 Hz, 1H), 7.18 (d, *J* = 7.6 Hz, 4H), 7.06 (t, *J* = 7.8 Hz, 4H), 6.97 (t, *J* = 7.5 Hz, 4H), 6.65 (d, *J* = 8.1 Hz, 4H), 6.08 (s, 1H); <sup>13</sup>C NMR (101 MHz, Chloroform-*d*) δ 159.75 (s, C), 155.44 (d, *J*<sub>C-P</sub> = 3.2 Hz, C), 145.08 (s, 2C), 143.07 (s, 4C), 137.76 (d, *J*<sub>C-P</sub> = 10.2 Hz, C), 134.08 (d, *J*<sub>C-P</sub> = 59.1 Hz, C), 133.49 (s, CH), 131.97 (d, *J*<sub>C-P</sub> = 5.6 Hz, 2CH), 131.91 (s, CH), 131.04 (d, *J*<sub>C-P</sub> = 5.4 Hz, CH), 128.55 (d, *J*<sub>C-P</sub> = 13.2 Hz, 2CH), 127.63 (s, 4CH), 127.24 (s, 4CH), 126.95 (s, CH), 125.41 (d, *J*<sub>C-P</sub> = 10.6 Hz, CH), 124.60 (s, 4C), 123.98 (s, 4CH), 121.87 (s, 2CH), 119.14 (s, 4CH), 118.51 (d, *J*<sub>C-P</sub> = 5.2 Hz, CH), 115.95 (d, *J*<sub>C-P</sub> = 103.2 Hz, C), 92.95 (d, *J*<sub>C-P</sub> = 104.1 Hz, CH). HRMS Calcd. For C<sub>44</sub>H<sub>30</sub>N<sub>2</sub>O<sub>2</sub>PS<sub>2</sub><sup>+</sup> [M + H]<sup>+</sup>, 713.1481. Found: 713.1480.

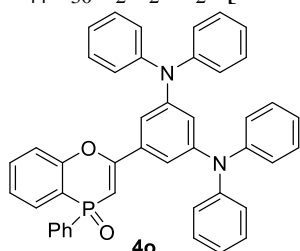

Reaction condition as general procedure for synthesis of compounds **4**: The reaction of compound **3** (476 mg, 1 mmol) and Diphenylamine(DPA) (402 mg, 2.2 mmol), then a flash column chromatography (CH<sub>2</sub>Cl<sub>2</sub> : ethyl acetate = 20 : 1 (v/v)) afforded White solid **4o** (522 mg, 80% yield); <sup>31</sup>P NMR (162 MHz, Chloroform-*d*) δ -1.14; <sup>1</sup>H NMR (400 MHz, Chloroform-*d*) δ 7.66 – 7.61 (m, 2H), 7.58 – 7.53 (m, 1H), 7.49 – 7.39 (m, 4H), 7.23 – 7.19 (m, 10H), 7.16 – 7.11 (m, 1H), 7.07 – 7.05 (m, 9H), 6.98 (t, *J* = 7.2 Hz, 4H), 6.89 (d, *J* = 2.2 Hz, 1H), 5.74 (d, *J* = 2.4 Hz, 1H); <sup>13</sup>C NMR (101 MHz, Chloroform-*d*) δ 161.39 (s, C), 155.43 (d, *J*<sub>C-P</sub> = 3.4 Hz, C), 149.07 (s, 2C), 147.06 (s, 4C), 135.71 (d, *J*<sub>C-P</sub> = 10.3 Hz, C), 134.43 (d, *J*<sub>C-P</sub> = 120.0 Hz, C), 133.19 (s, CH), 131.96 (d, *J*<sub>C-P</sub> = 10.8 Hz, 2CH), 131.70 (d, *J*<sub>C-P</sub> = 2.9 Hz, CH), 130.90 (d, *J*<sub>C-P</sub> = 5.5 Hz, CH), 129.35 (s, 8CH), 128.43 (d, *J*<sub>C-P</sub> = 13.1 Hz, 2CH), 125.08 (d, *J*<sub>C-P</sub> = 10.5 Hz, CH), 124.39 (s, 8CH), 123.35 (s, 4CH), 120.67 (s, CH), 118.49 (d, *J*<sub>C-P</sub> = 5.3 Hz, CH), 115.91 (d, *J*<sub>C-P</sub> = 103.0 Hz, C), 115.06 (s, 2CH), 91.67 (d, *J*<sub>C-P</sub> = 104.9 Hz, CH). HRMS Calcd. For C<sub>44</sub>H<sub>34</sub>N<sub>2</sub>O<sub>2</sub>P<sup>+</sup> [M + H]<sup>+</sup>, 653.2352. Found: 653.2350.

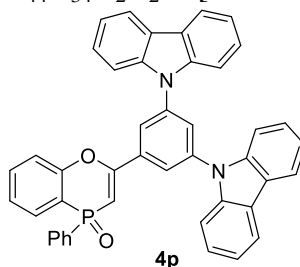

Reaction condition as general procedure for synthesis of compounds **4**: The reaction of compound **3** (476 mg, 1 mmol) and Carbazole(CZ) (398 mg, 2.2 mmol), then a flash column chromatography (CH<sub>2</sub>Cl<sub>2</sub> : ethyl acetate = 20 : 1 (v/v)) afforded Yellow solid **4p** (521 mg, 77% yield); <sup>31</sup>P NMR (162 MHz, Chloroform-*d*) δ -1.49; <sup>1</sup>H NMR (400 MHz, Chloroform-*d*) δ 8.21 – 8.17 (m, 6H), 7.98 (d, *J* = 2.0 Hz, 1H), 7.79 – 7.67 (m, 4H), 7.62 – 7.57 (m, 5H), 7.52 – 7.47 (m, 6H), 7.41 – 7.29 (m, 6H), 6.28 (d, *J* = 1.8 Hz, 1H); <sup>13</sup>C NMR (101 MHz, Chloroform-*d*) δ 159.52 (s, C), 155.49 (d, *J*<sub>C-P</sub> = 3.3 Hz, C), 140.42 (s, 4C), 140.16 (s, 2C), 137.33 (d, *J*<sub>C-P</sub> = 10.2 Hz, C), 133.87 (d, *J*<sub>C-P</sub> = 60.60 Hz, C), 133.66 (s, CH), 132.04 (d, *J*<sub>C-P</sub> = 4.0 Hz, 2CH), 131.91 (s, CH), 131.12 (d, *J*<sub>C-P</sub> = 5.5 Hz, CH), 128.64 (d, *J*<sub>C-P</sub> = 13.3 Hz, 2CH), 127.31 (s, CH), 126.46 (s, 4C), 125.61 (d, *J*<sub>C-P</sub> = 10.6 Hz, CH), 123.82 (s, 4C), 123.37 (s, 2CH), 120.78 (s, 4C), 120.65 (s, 4C), 118.58 (d, *J*<sub>C-P</sub> = 5.5 Hz, CH), 115.91 (d, *J*<sub>C-P</sub> = 103.6 Hz, C), 109.54 (s, 4C), 93.74 (d, *J*<sub>C-P</sub> = 103.5 Hz, CH). HRMS Calcd. For C<sub>44</sub>H<sub>30</sub>N<sub>2</sub>O<sub>2</sub>P<sup>+</sup> [M + H]<sup>+</sup>, 649.2039. Found: 649.2040.

[1] S. Xu, H. Huang, Z. Yan, Q. Xiao, *Org. Lett.* **2019**, *21*, 10018-10022.

## 5. The photoelectric properties.

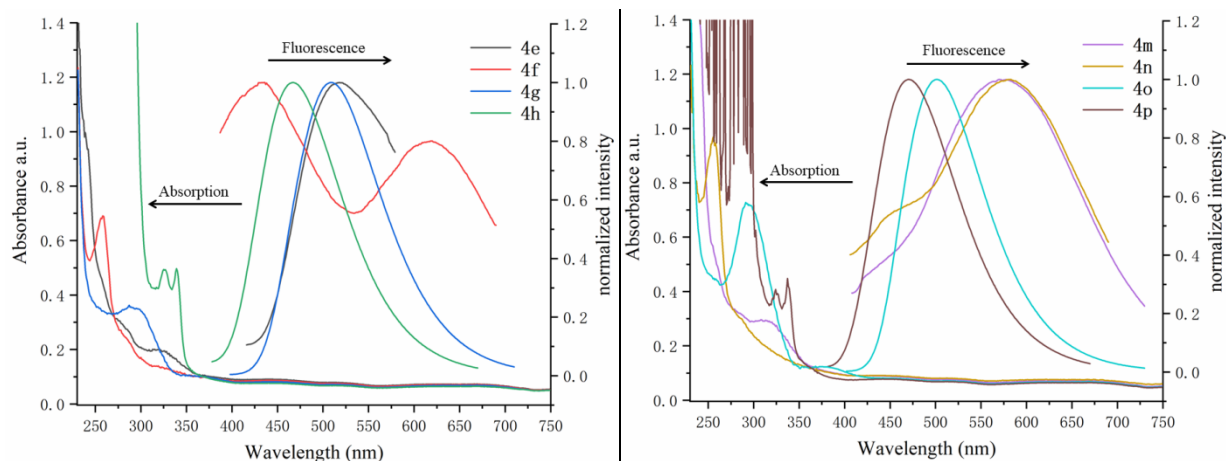

**Figure s1.** UV-vis absorption spectra and fluorescence spectra of the amino-substituted phenyl-phosphochromones **4e – h** and **4m - p** in  $\text{CH}_2\text{Cl}_2$  ( $1 \times 10^{-5}$  M) at rt.

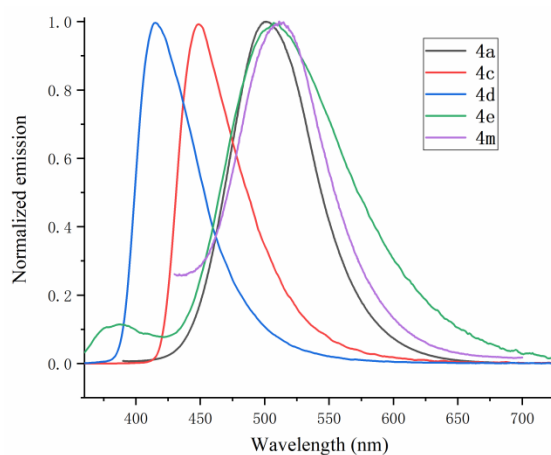

**Figure s2.** Fluorescence spectra of compound **4c - 4e** in film (The sample film was a host-guest system composed of **4e** (mass fraction 0.3%) as the guest and  $\beta$ -estradiol as the host matrix on a glass substrate).

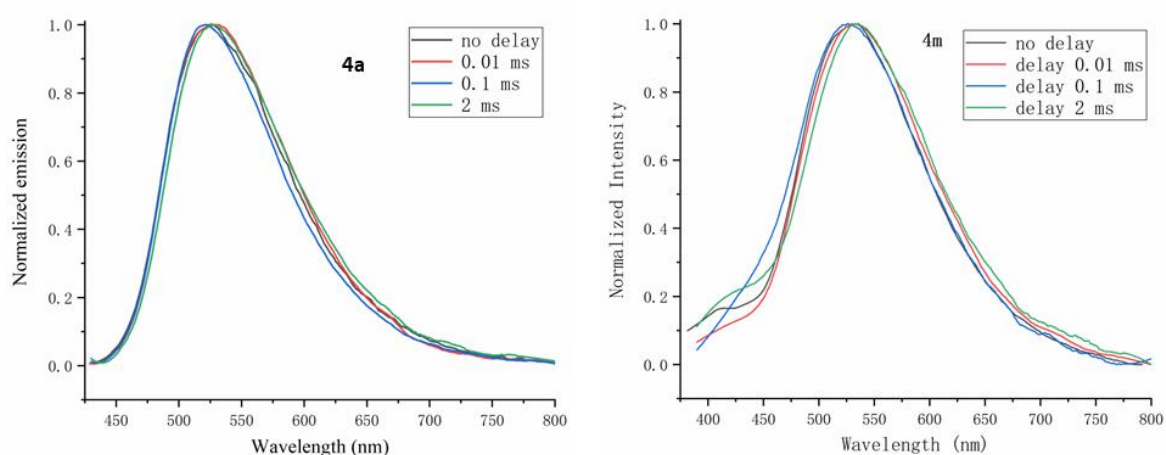

**Figure s3.** Prompt and delayed emission spectra **4a** (left) and **4m** (right) in the film (The sample film was a host-guest system composed of **4e** (mass fraction 0.3%) as the guest and  $\beta$ -estradiol as the host matrix on a glass substrate).

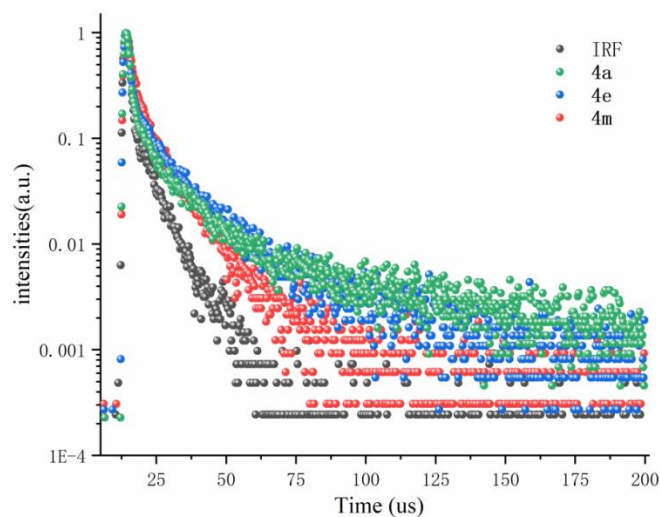

**Figure s4.** Fluorescence lifetime of **4a**, **4e**, and **4m** in the film at room temperature. prompt fluorescence (**4a**:  $\tau_1 = 3.6$  ns,  $\tau_2 = 21.0$  ns; **4e**:  $\tau_1 = 5.7$  ns,  $\tau_2 = 48$  ns; **4m**:  $\tau_1 = 2.7$  ns,  $\tau_2 = 26.1$  ns, lifetime) and delayed fluorescence (**4a**:  $\tau_1 = 1.5$   $\mu$ s,  $\tau_2 = 17.1$   $\mu$ s; **4e**:  $\tau_1 = 1.5$   $\mu$ s,  $\tau_2 = 8.7$   $\mu$ s,  $\tau_3 = 25.7$   $\mu$ s; **4m**:  $\tau_1 = 1.1$   $\mu$ s,  $\tau_2 = 17.9$   $\mu$ s, lifetime)

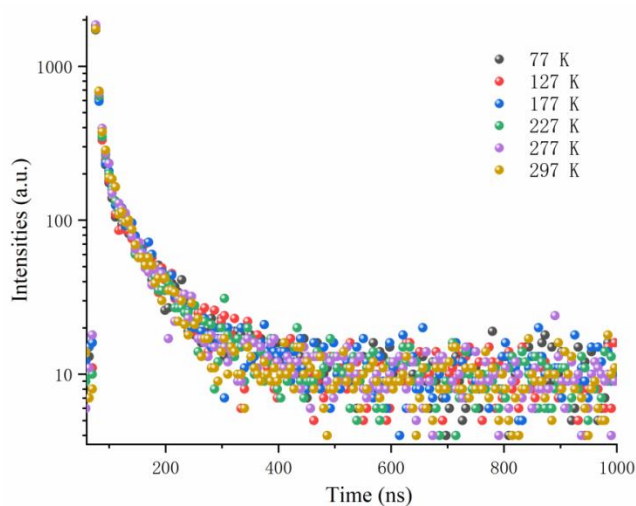

**Figure s5.** Temperature-dependent luminescence prompt decayed curves of **4e** in the film at 525 nm.

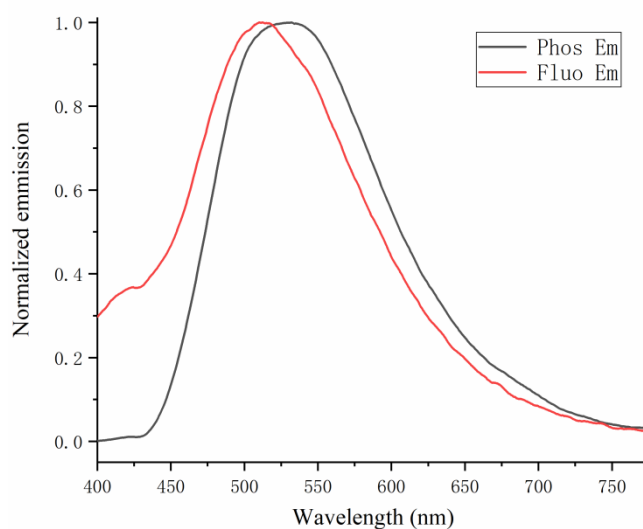

**Figure s6.** Phosphorescence spectra at 77 K and fluorescence spectra at room temperature.

## 6. The calculation data.

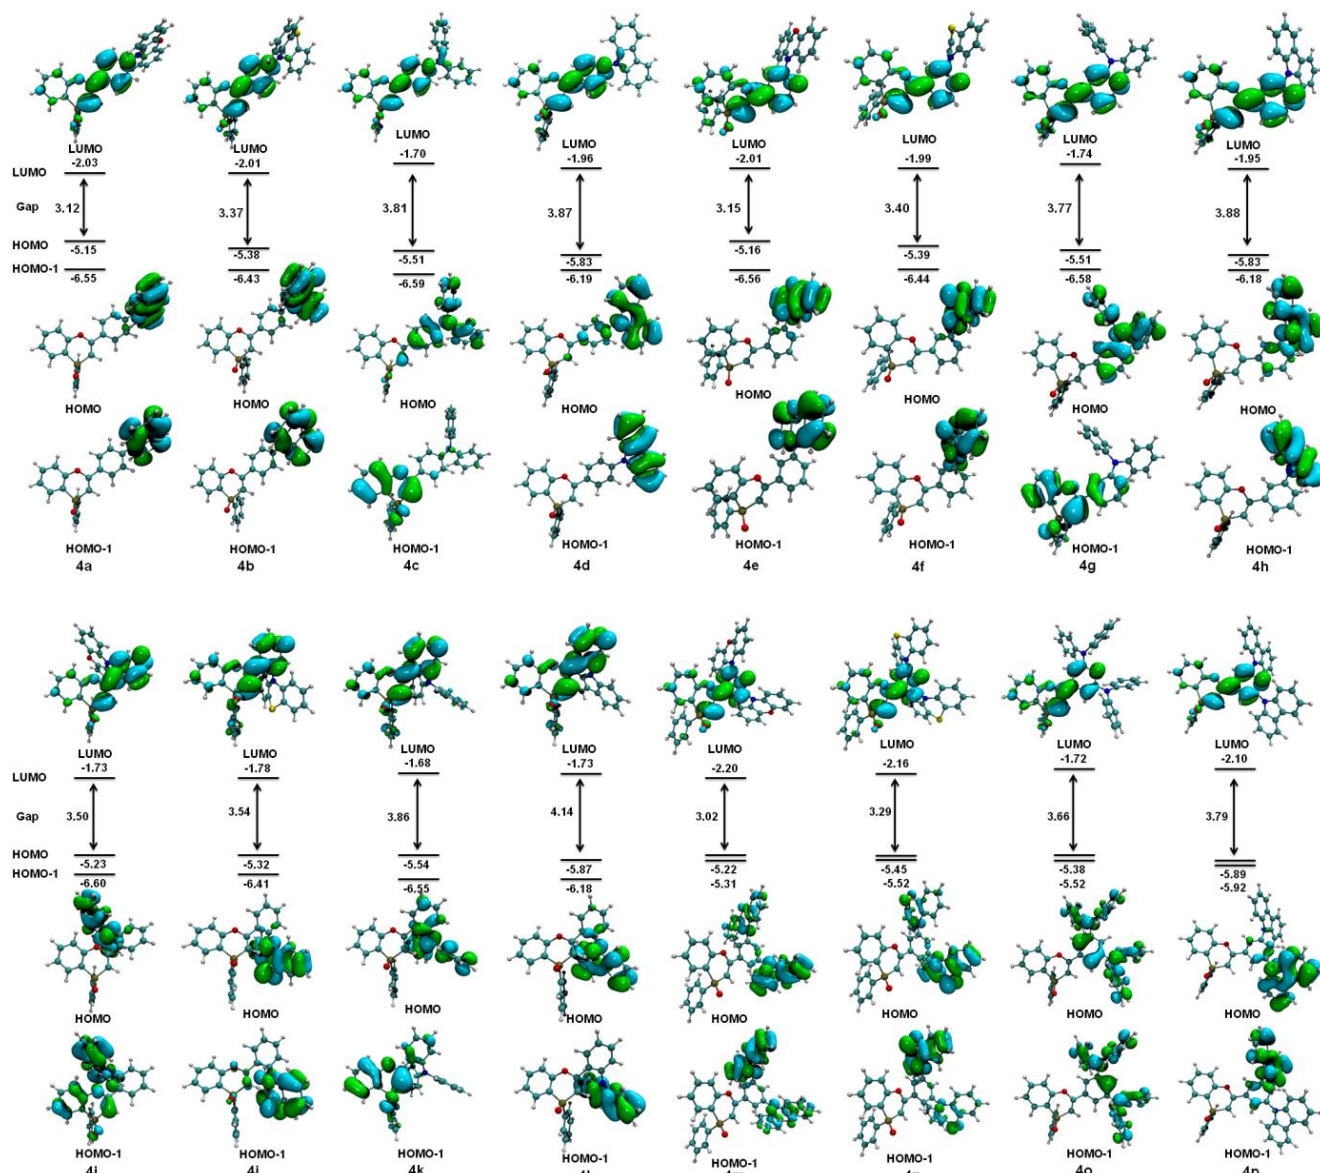

**Figure s7.** Frontier orbital distributions and LUMO/HOMO gaps of the compounds **4a** - **4n** based on DFT/B3LYP/6-311G+(d, p); orbital energies in eV.

**Table s1.** The energy difference ( $\Delta E_{ST}$ ) between the first singlet excited state (S1) and first triplet excited state (T1) gotten by TD-DFT calculation at b3lyp/6-311G+(d,p) level.<sup>a</sup>

| compd                   | <b>4a</b> | <b>4b</b> | <b>4c</b> | <b>4d</b> | <b>4e</b> | <b>4f</b> | <b>4g</b> | <b>4h</b> | <b>4i</b> | <b>4j</b> | <b>4k</b> | <b>4l</b> | <b>4m</b> | <b>4n</b> | <b>4o</b> | <b>4p</b> |
|-------------------------|-----------|-----------|-----------|-----------|-----------|-----------|-----------|-----------|-----------|-----------|-----------|-----------|-----------|-----------|-----------|-----------|
| $\Delta E_{ST}$<br>(eV) | 0.01      | 0.02      | 0.74      | 0.48      | 0.04      | 0.06      | 0.44      | 0.33      | 0.08      | 0.06      | 0.32      | 0.31      | 0.03      | 0.05      | 0.34      | 0.30      |

[a] the calculation of excited states based on the optimized structures of their ground states.

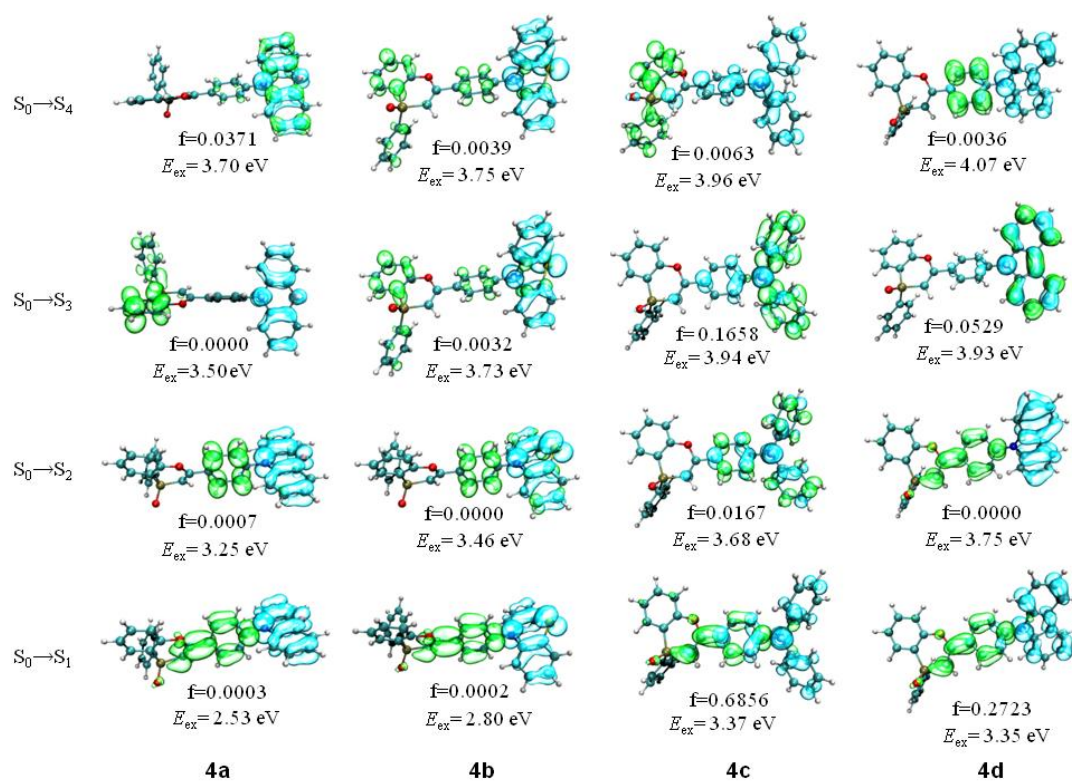

**Figure s8.** Electrons and holes of the vertical excitation process for **4a–4d** based on DFT/B3LYP/6-311G+(d, p); electrons in green and holes in blue transparent isosurface; energies in eV.

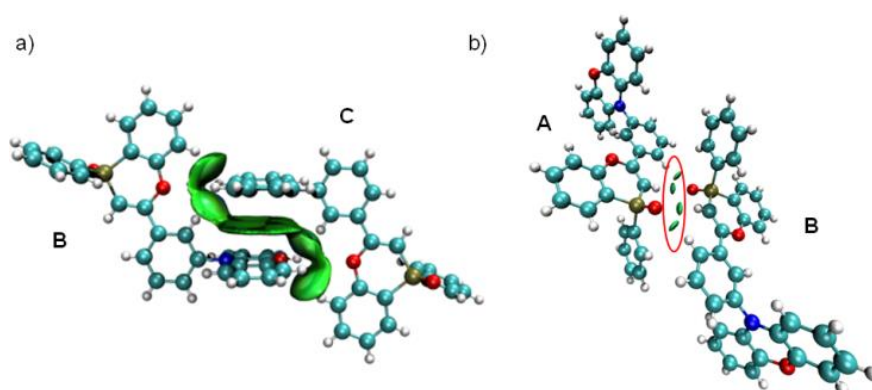

**Figure s9.** (a) Visualization of intermolecular  $\pi$ - $\pi$  stacking interaction by IGM (isovalue = 0.002); (b) Visualization of intermolecular H-bond interaction by IGM (isovalue = 0.014).

7. Copies of  $^{31}\text{P}$  NMR,  $^1\text{H}$  NMR,  $^{13}\text{C}$  NMR Spectra.

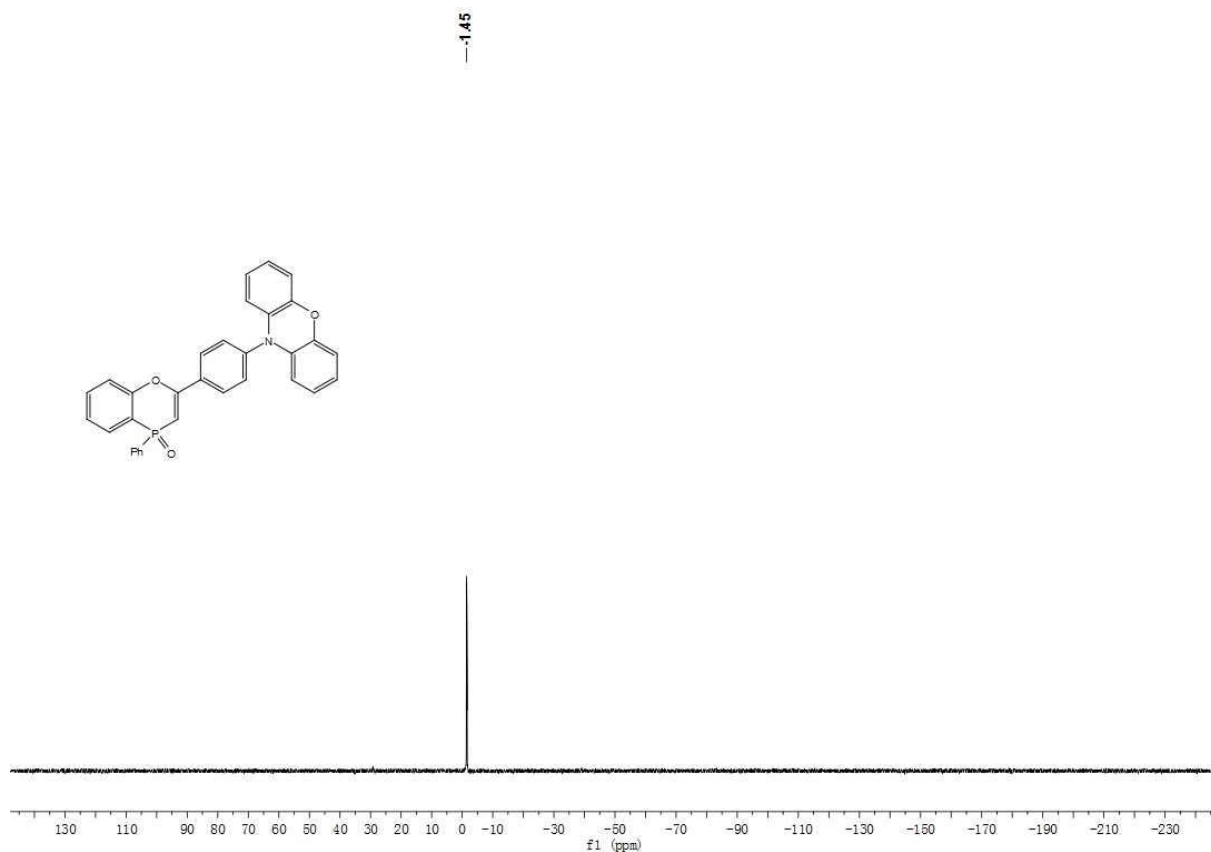

$^{31}\text{P}$  NMR ( $\text{CDCl}_3-d$ ) of 4a

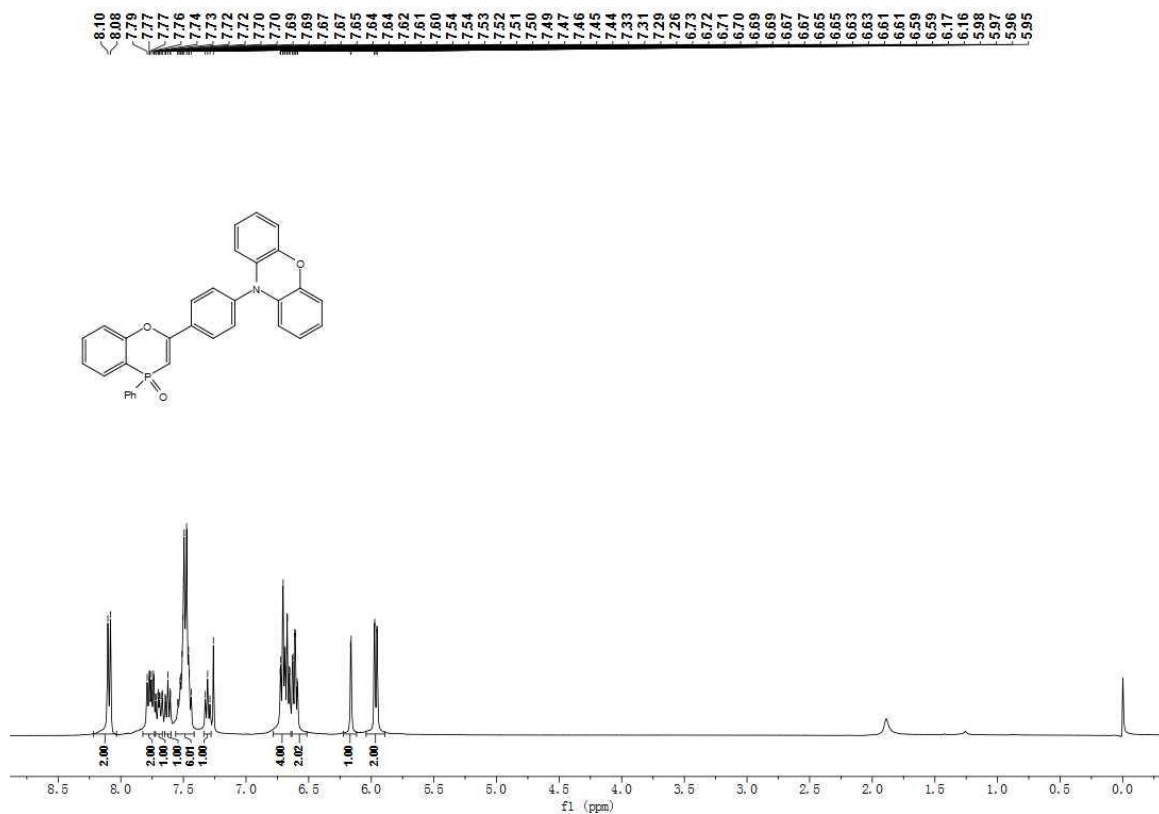

$^1\text{H}$  NMR ( $\text{CDCl}_3-d$ ) of 4a

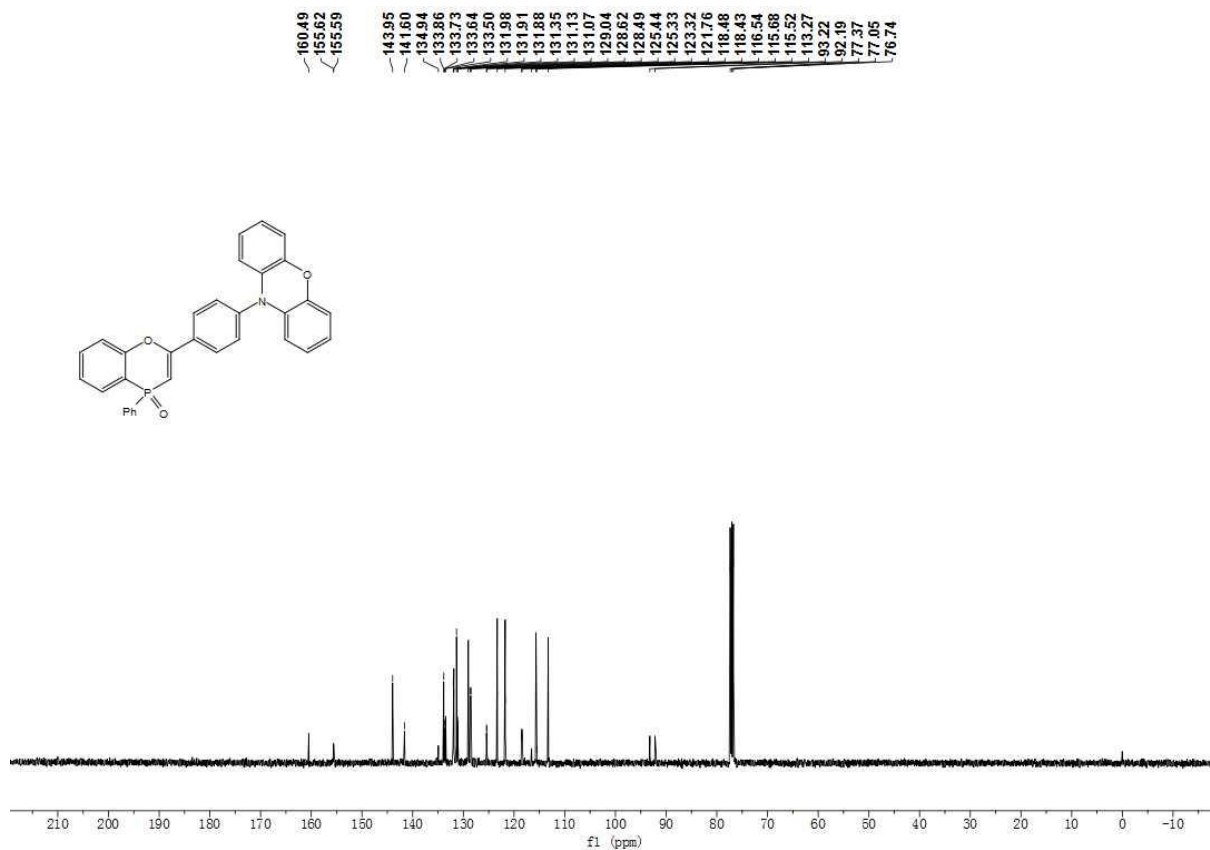

$^{13}\text{C}$  NMR ( $\text{CDCl}_3-d$ ) of **4a**

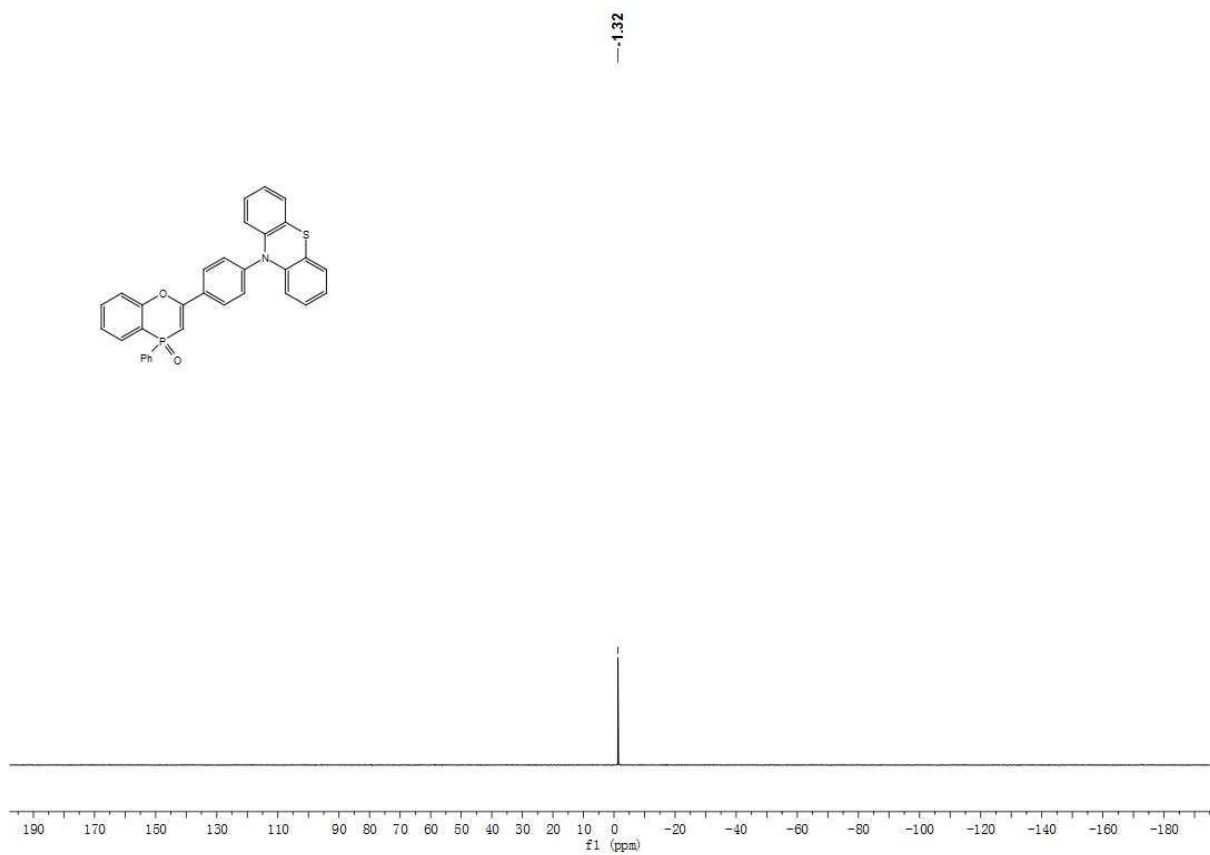

$^{31}\text{P}$  NMR ( $\text{CDCl}_3-d$ ) of **4b**

7.96  
7.95  
7.94  
7.94  
7.78  
7.77  
7.76  
7.76  
7.75  
7.74  
7.73  
7.72  
7.70  
7.68  
7.67  
7.66  
7.65  
7.65  
7.59  
7.58  
7.57  
7.57  
7.50  
7.50  
7.49  
7.49  
7.48  
7.47  
7.47  
7.46  
7.45  
7.44  
7.44  
7.44  
7.43  
7.42  
7.41  
7.39  
7.37  
7.36  
7.35  
7.35  
7.29  
7.27  
7.26  
7.25  
7.20  
7.19  
7.18  
7.17  
7.06  
7.05  
7.04  
7.03  
7.02  
7.01  
7.01  
6.98  
6.98  
6.96  
6.95  
6.94  
6.67  
6.65  
6.65  
6.08

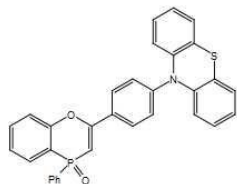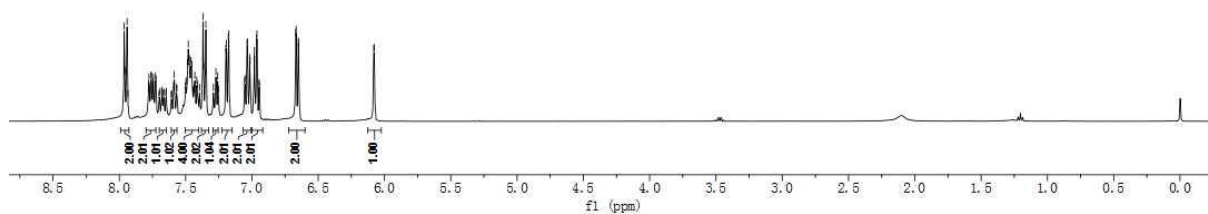

$^1\text{H}$  NMR ( $\text{CDCl}_3\text{-}d$ ) of **4b**

160.89  
155.62  
155.59  
145.25  
142.95  
135.13  
133.94  
133.37  
131.97  
131.87  
131.79  
131.76  
131.07  
131.02  
130.69  
130.59  
128.57  
128.44  
128.29  
127.62  
127.07  
125.52  
125.50  
125.27  
125.17  
124.05  
120.03  
118.44  
118.39  
116.61  
115.36  
91.84  
90.79  
77.41  
77.09  
76.78

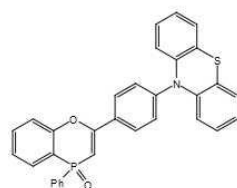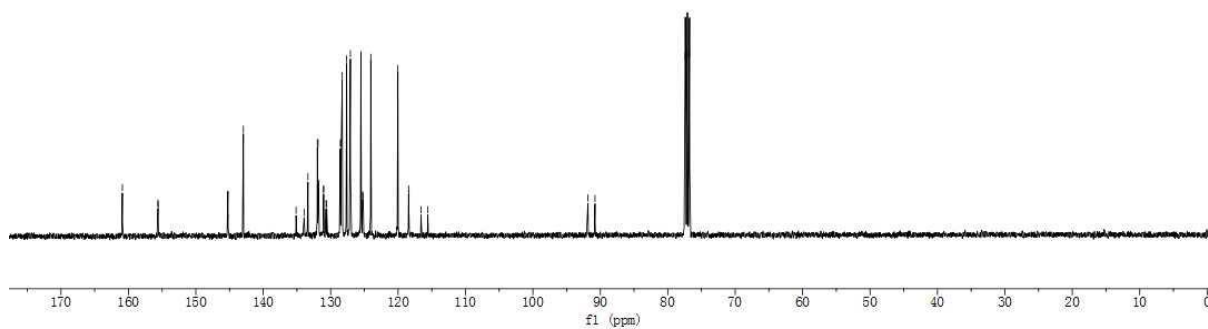

$^{13}\text{C}$  NMR ( $\text{CDCl}_3\text{-}d$ ) of **4b**



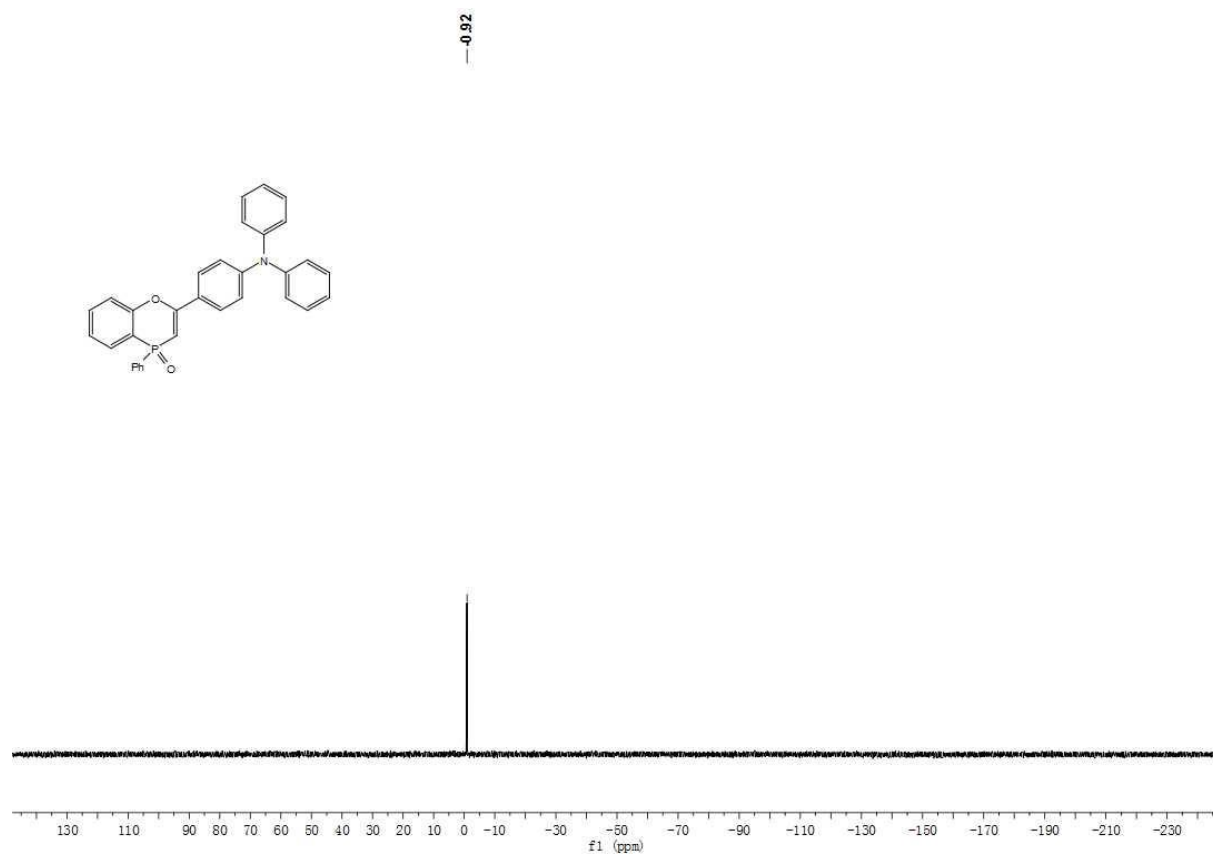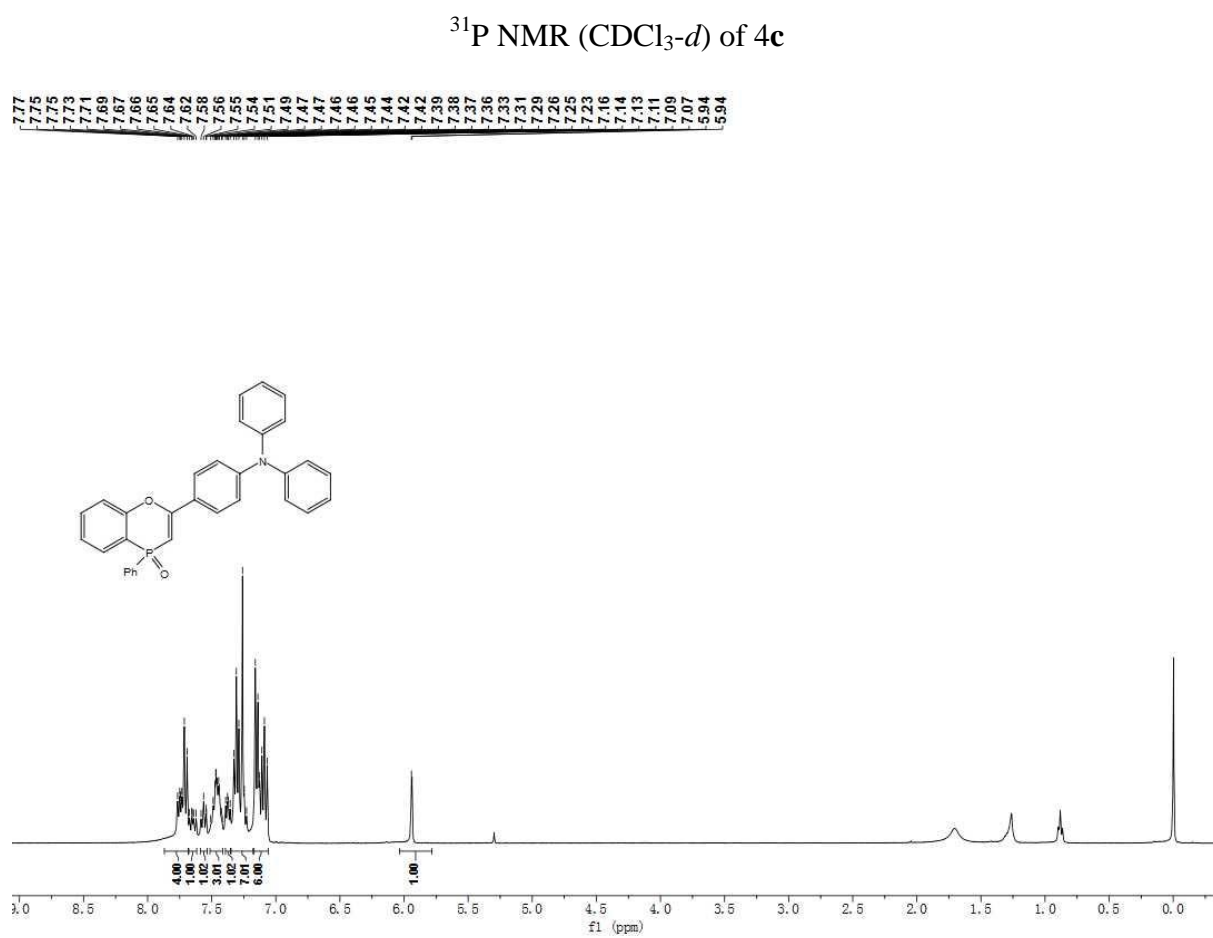

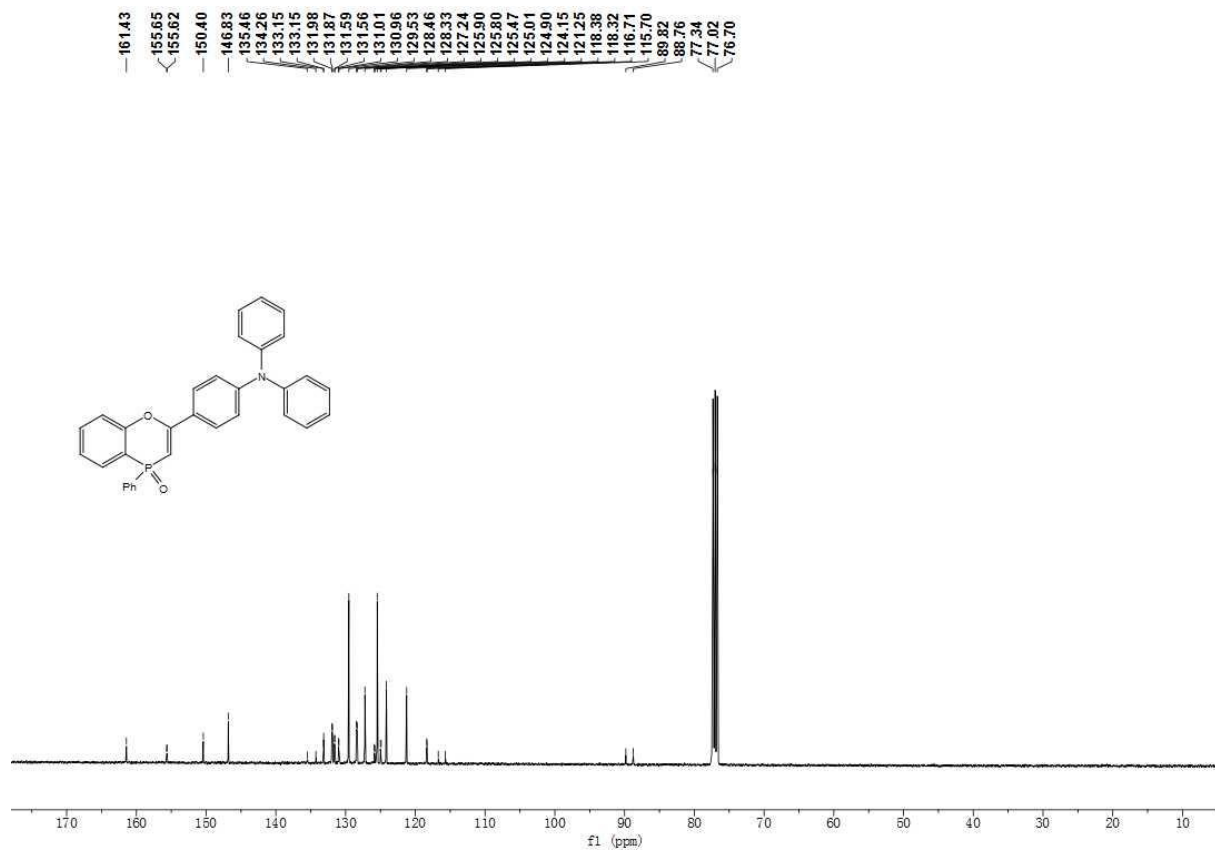

$^{13}\text{C}$  NMR ( $\text{CDCl}_3-d$ ) of **4c**

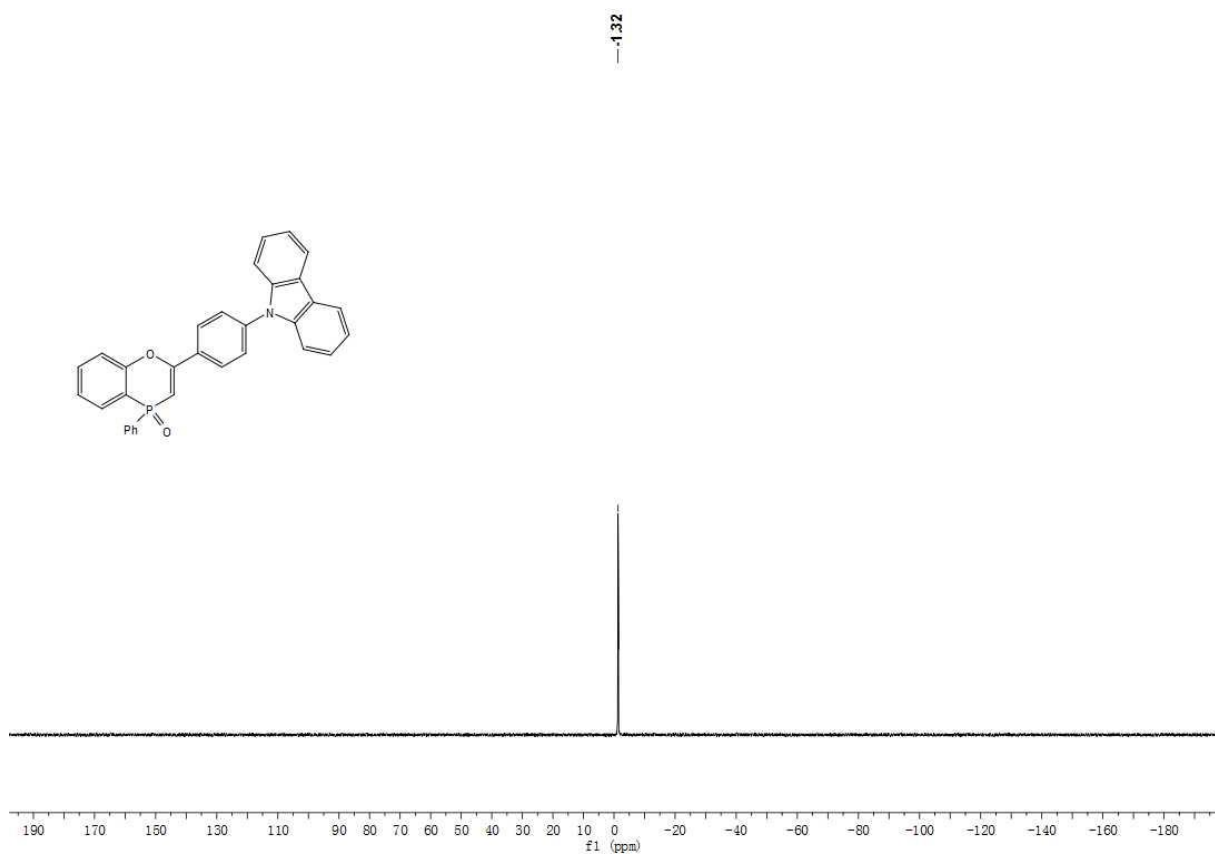

$^{31}\text{P}$  NMR ( $\text{CDCl}_3-d$ ) of **4d**

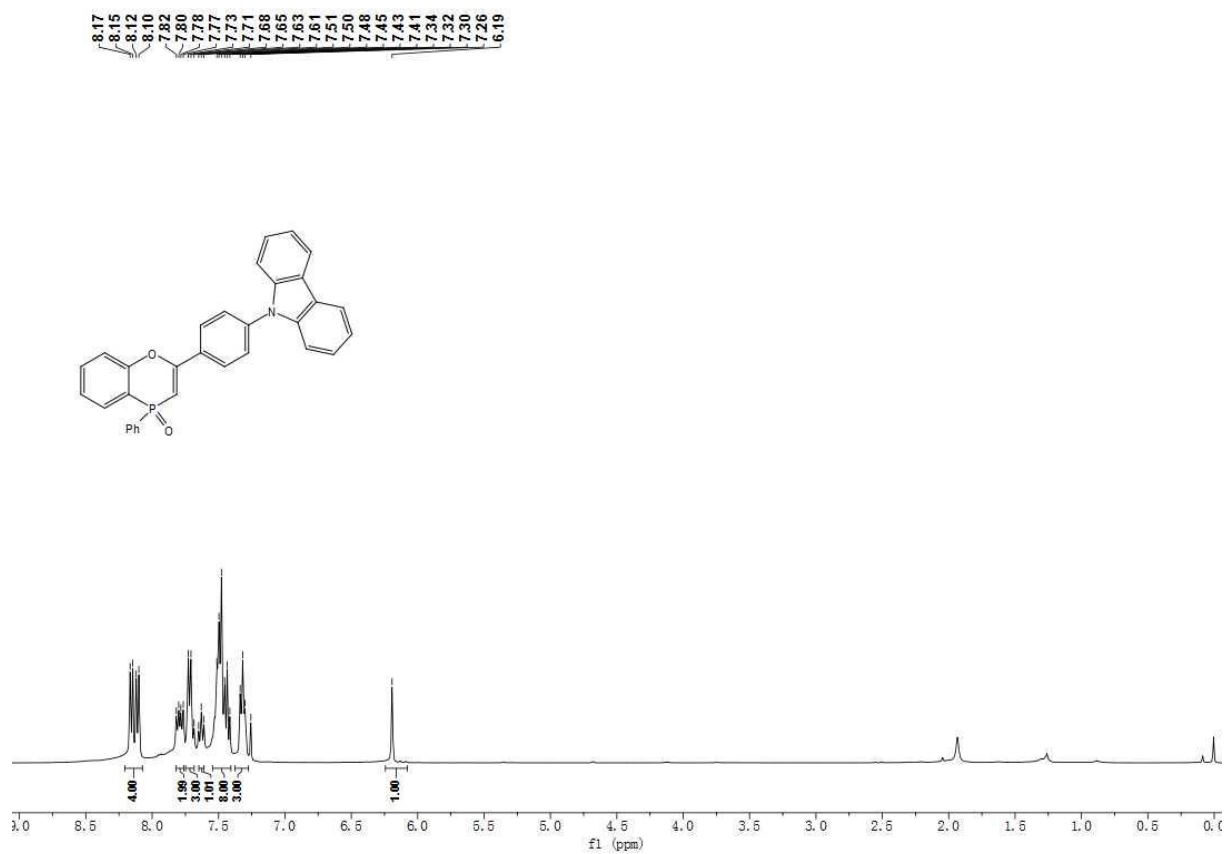

$^1\text{H}$  NMR ( $\text{CDCl}_3-d$ ) of **4d**

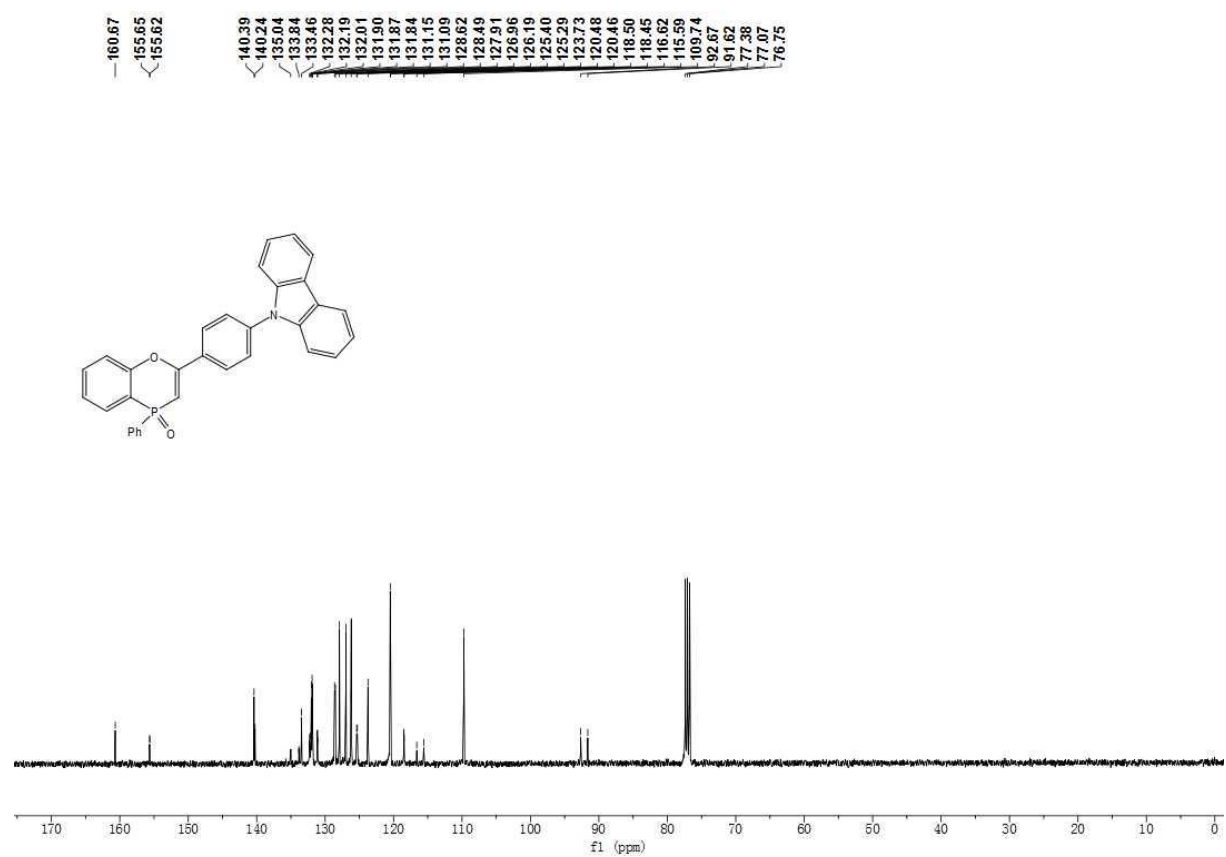

$^{13}\text{C}$  NMR ( $\text{CDCl}_3-d$ ) of **4d**

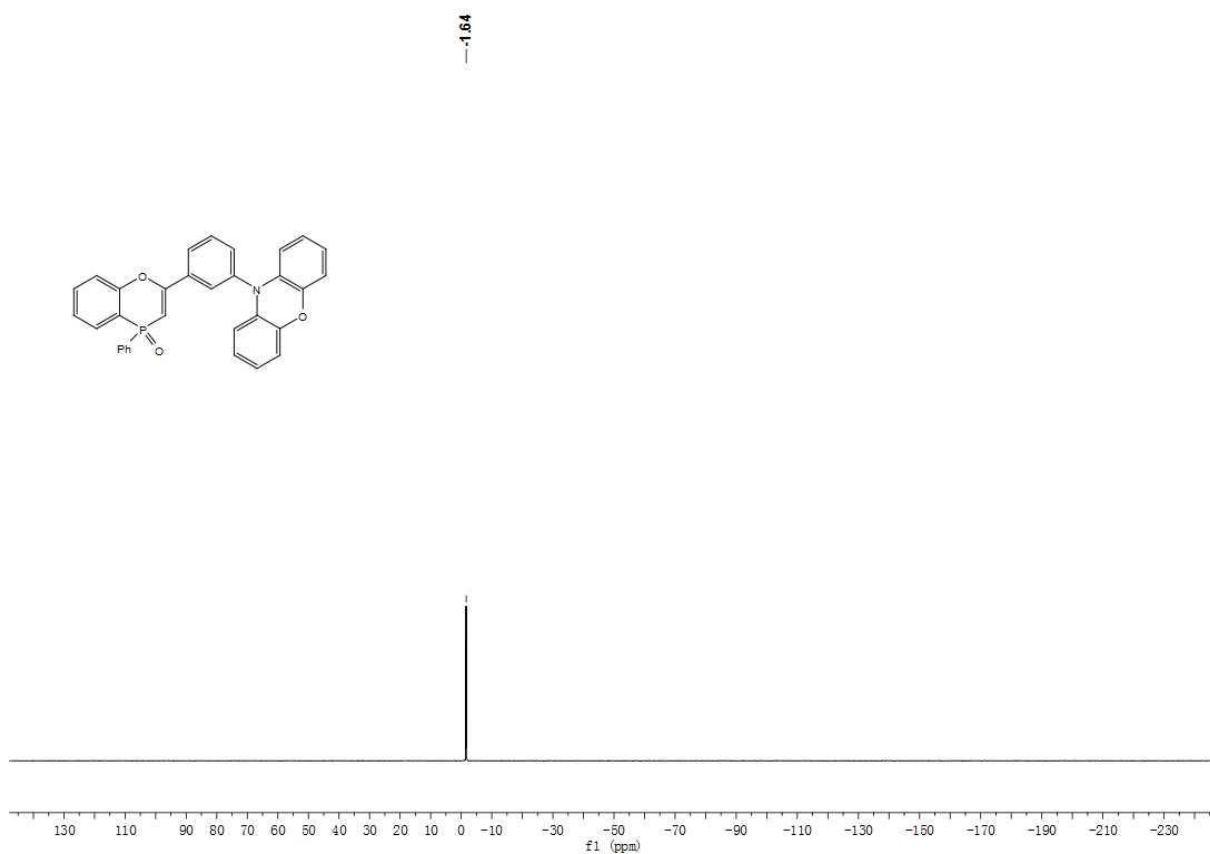

$^{31}\text{P}$  NMR ( $\text{CDCl}_3-d$ ) of 4e

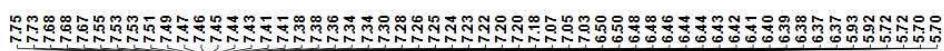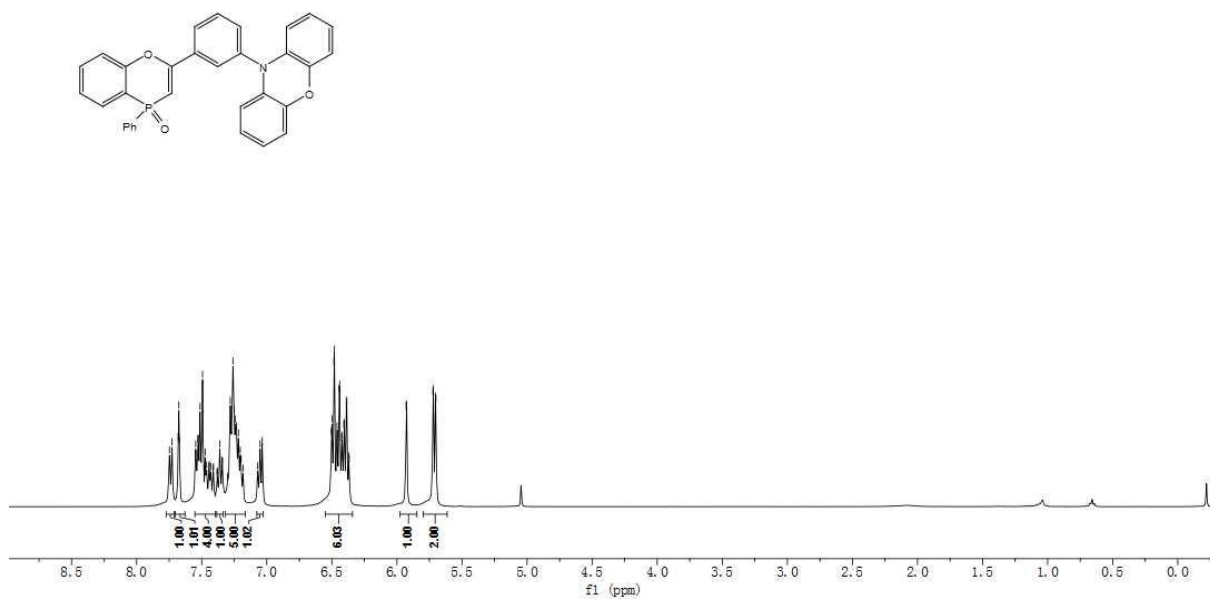

$^1\text{H}$  NMR ( $\text{CDCl}_3-d$ ) of 4e

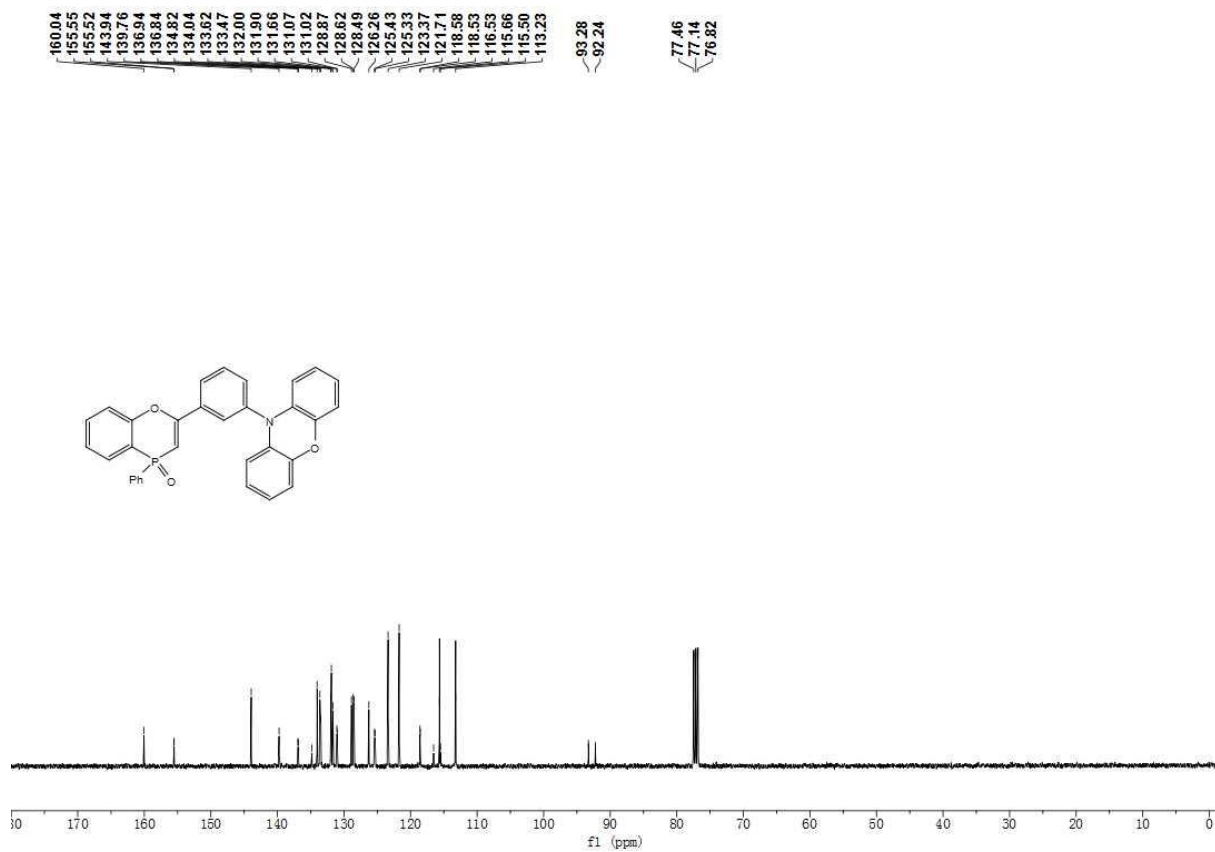

<sup>13</sup>C NMR (CDCl<sub>3</sub>-d) of 4e

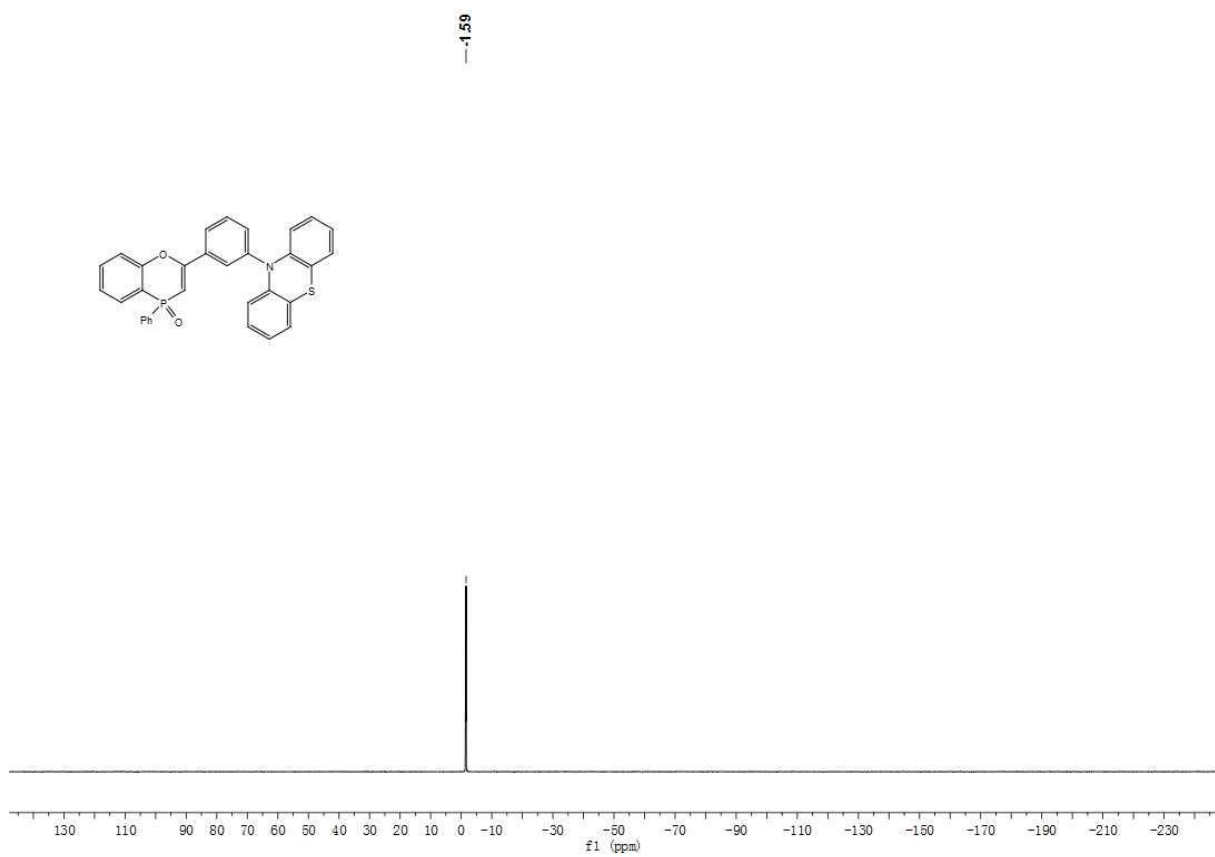

<sup>31</sup>P NMR (CDCl<sub>3</sub>-d) of 4f

7.94  
7.92  
7.92  
7.77  
7.76  
7.75  
7.74  
7.73  
7.72  
7.71  
7.70  
7.69  
7.68  
7.67  
7.66  
7.65  
7.63  
7.61  
7.60  
7.58  
7.57  
7.56  
7.54  
7.53  
7.52  
7.51  
7.51  
7.50  
7.49  
7.48  
7.47  
7.46  
7.45  
7.44  
7.43  
7.41  
7.39  
7.29  
7.27  
7.26  
7.25  
7.09  
7.08  
7.07  
7.06  
6.93  
6.93  
6.91  
6.91  
6.89  
6.89  
6.88  
6.88  
6.86  
6.84  
6.84  
6.30  
6.30  
6.28  
6.28  
6.15  
6.14

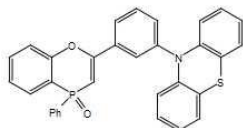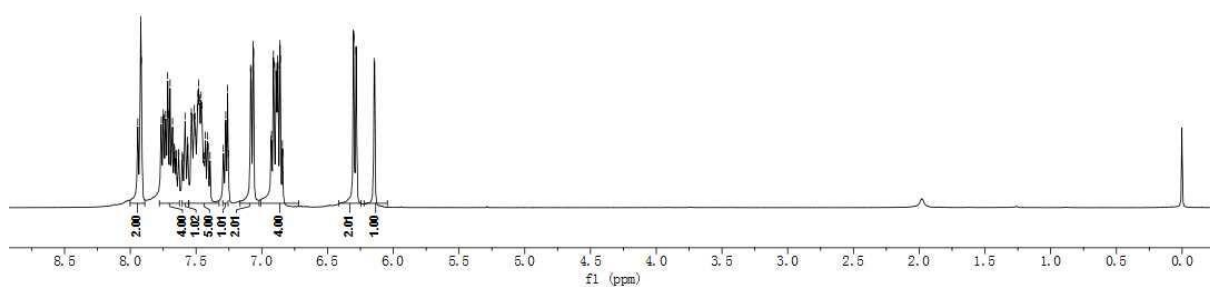

$^1\text{H}$  NMR ( $\text{CDCl}_3-d$ ) of **4f**

160.26  
155.57  
155.54  
143.81  
142.03  
136.59  
136.49  
134.87  
133.68  
133.44  
132.87  
132.01  
131.90  
131.87  
131.84  
131.09  
131.08  
131.02  
128.60  
128.47  
127.79  
127.06  
127.01  
125.52  
125.39  
125.29  
123.04  
124.38  
118.57  
118.52  
118.77  
118.55  
115.52  
93.16  
92.14  
77.39  
77.07  
76.75

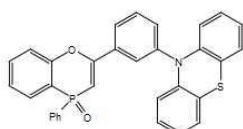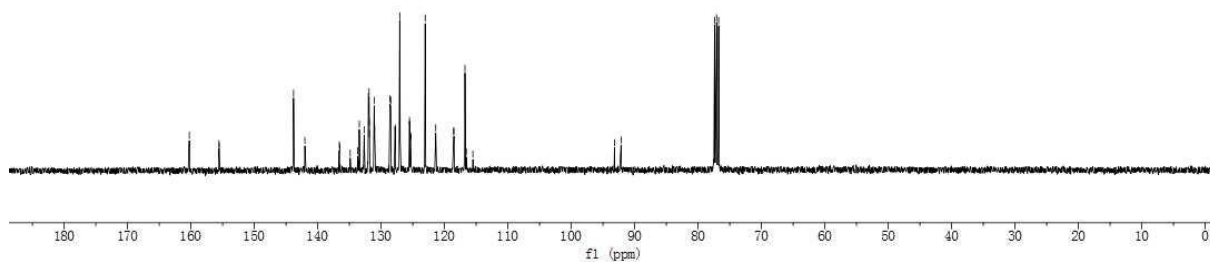

$^{13}\text{C}$  NMR ( $\text{CDCl}_3-d$ ) of **4f**

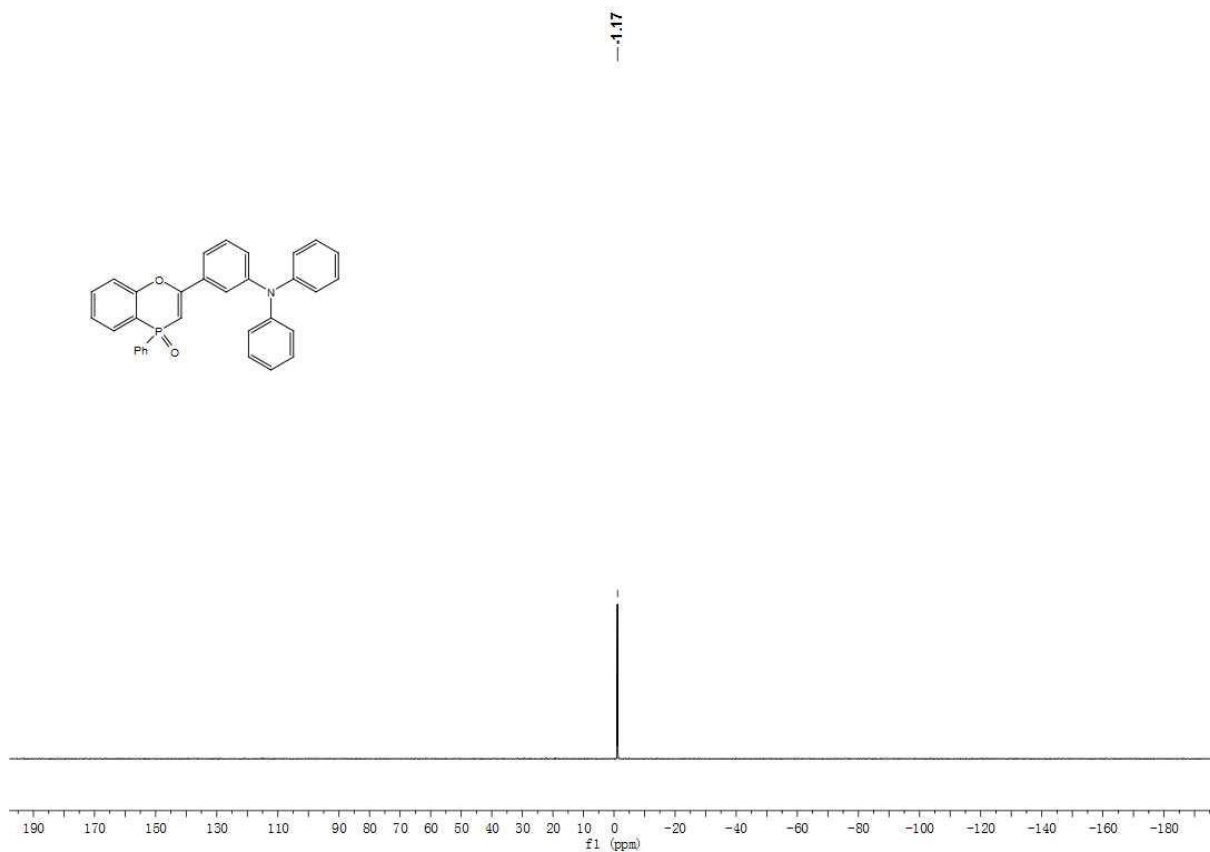

$^{31}\text{P}$  NMR ( $\text{CDCl}_3-d$ ) of **4g**

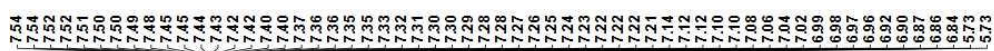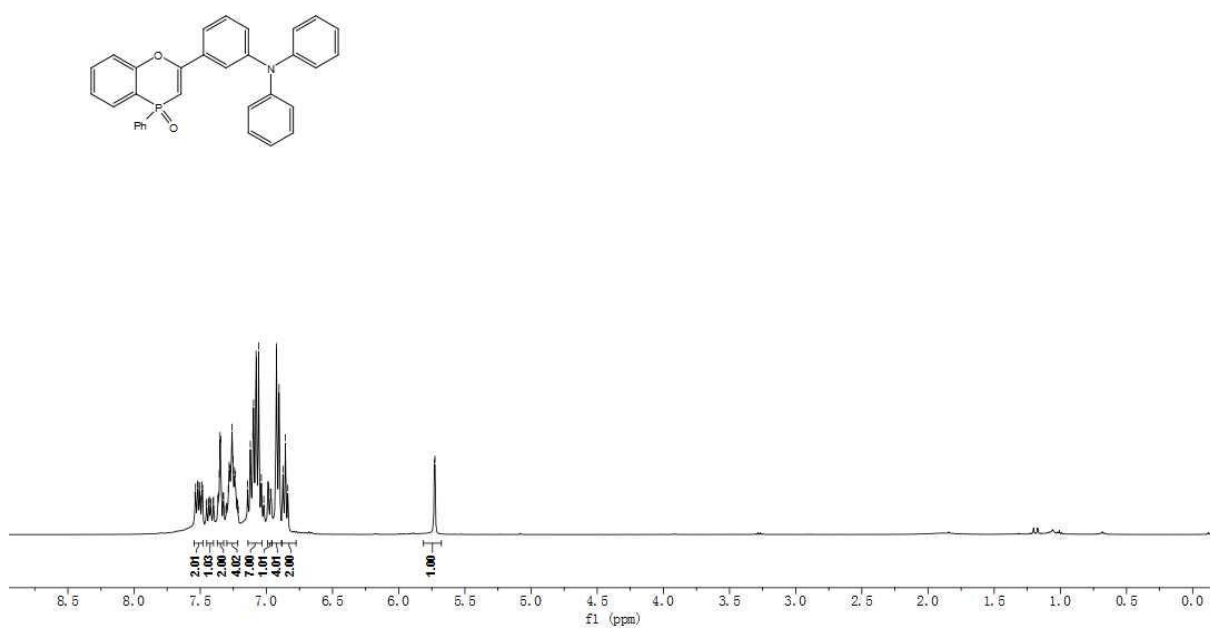

$^1\text{H}$  NMR ( $\text{CDCl}_3-d$ ) of **4g**

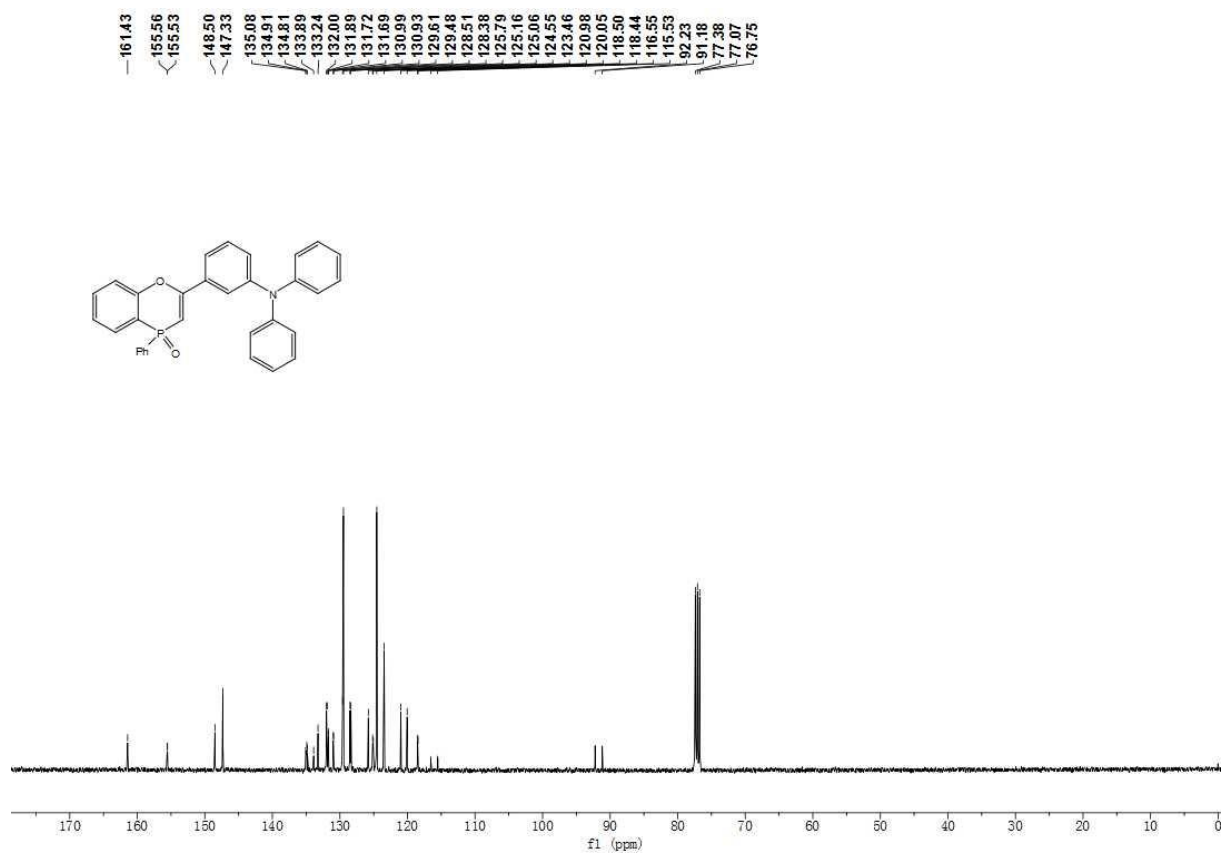

$^{13}\text{C}$  NMR (CDCl<sub>3</sub>-d) of **4g**

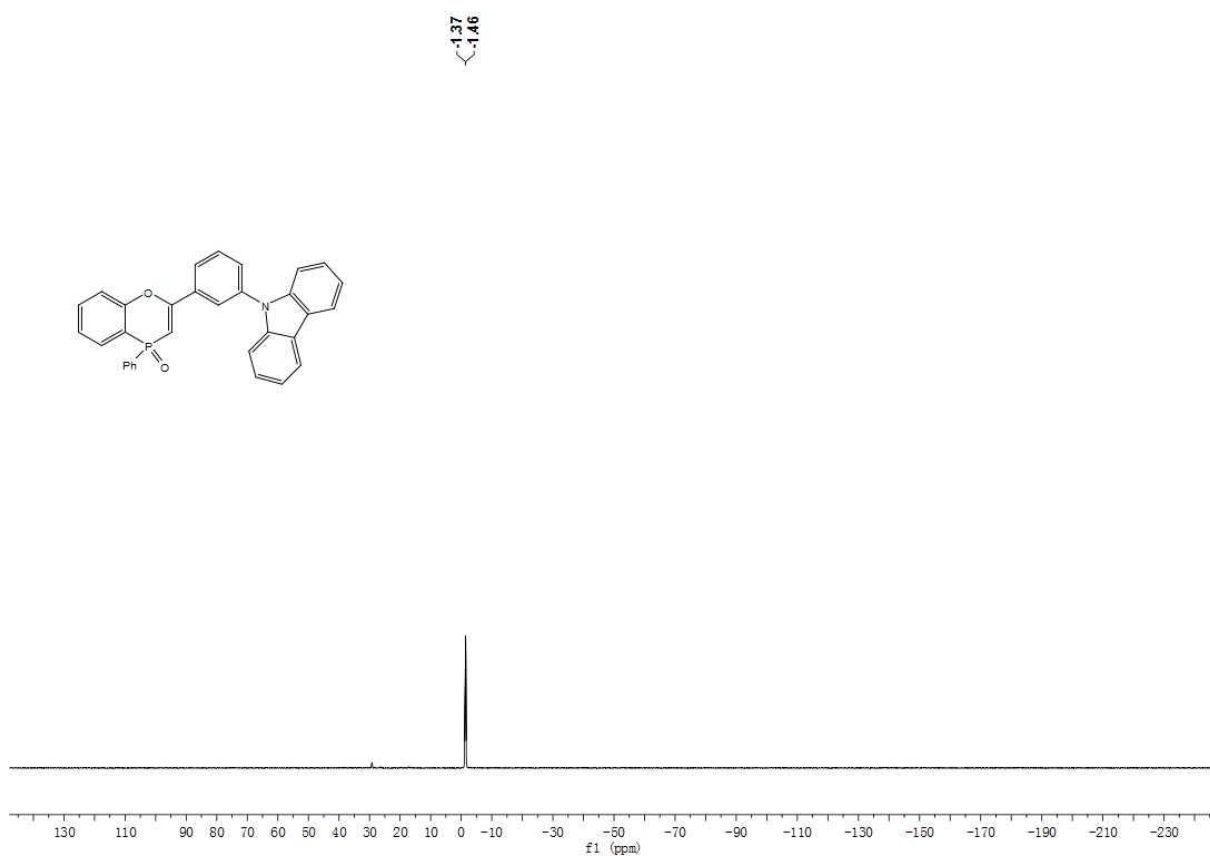

$^{31}\text{P}$  NMR (CDCl<sub>3</sub>-d) of **4h**



7.98  
7.96  
7.94  
7.77  
7.77  
7.76  
7.75  
7.61  
7.60  
7.59  
7.58  
7.56  
7.56  
7.54  
7.52  
7.50  
7.49  
7.47  
7.38  
7.36  
7.34  
7.32  
7.31  
7.29  
7.28  
7.27  
7.26  
7.25  
7.23  
7.20  
7.19  
7.18  
7.17  
7.16  
7.15  
7.14  
7.13  
7.12  
7.11  
7.09  
7.07  
7.06  
7.05  
6.02  
6.02

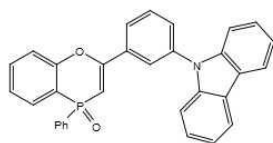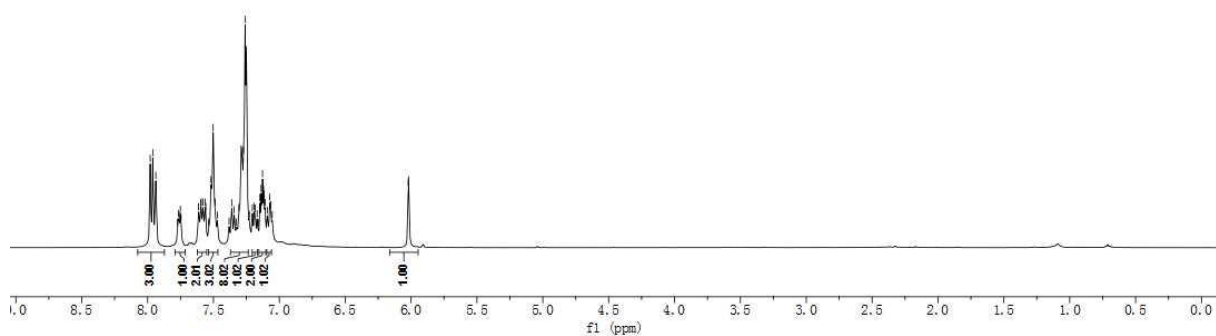

$^1\text{H NMR}$  ( $\text{CDCl}_3-d$ ) of 4h

160.46  
155.59  
155.56  
140.71  
138.50  
135.74  
135.64  
134.85  
133.65  
133.53  
133.11  
132.19  
132.09  
132.04  
131.96  
131.93  
131.10  
131.05  
130.54  
129.49  
128.85  
128.68  
128.63  
128.55  
128.51  
128.27  
125.48  
125.37  
125.21  
124.91  
123.60  
120.53  
120.41  
118.59  
118.54  
116.56  
115.53  
109.62  
93.30  
92.26  
77.61  
77.29  
76.97

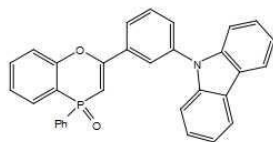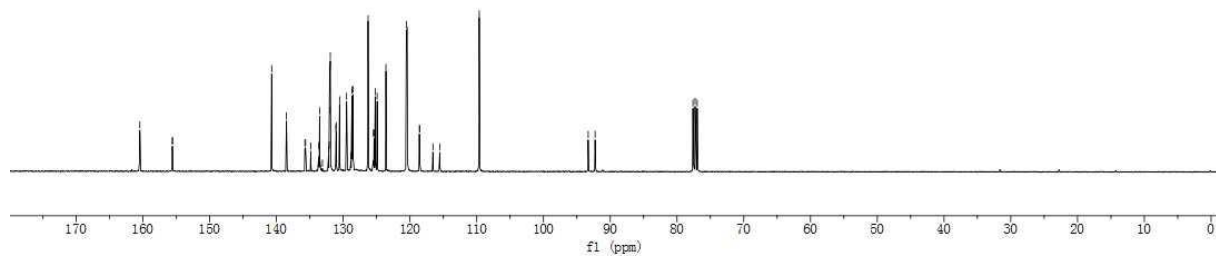

$^{13}\text{C NMR}$  ( $\text{CDCl}_3-d$ ) of 4h

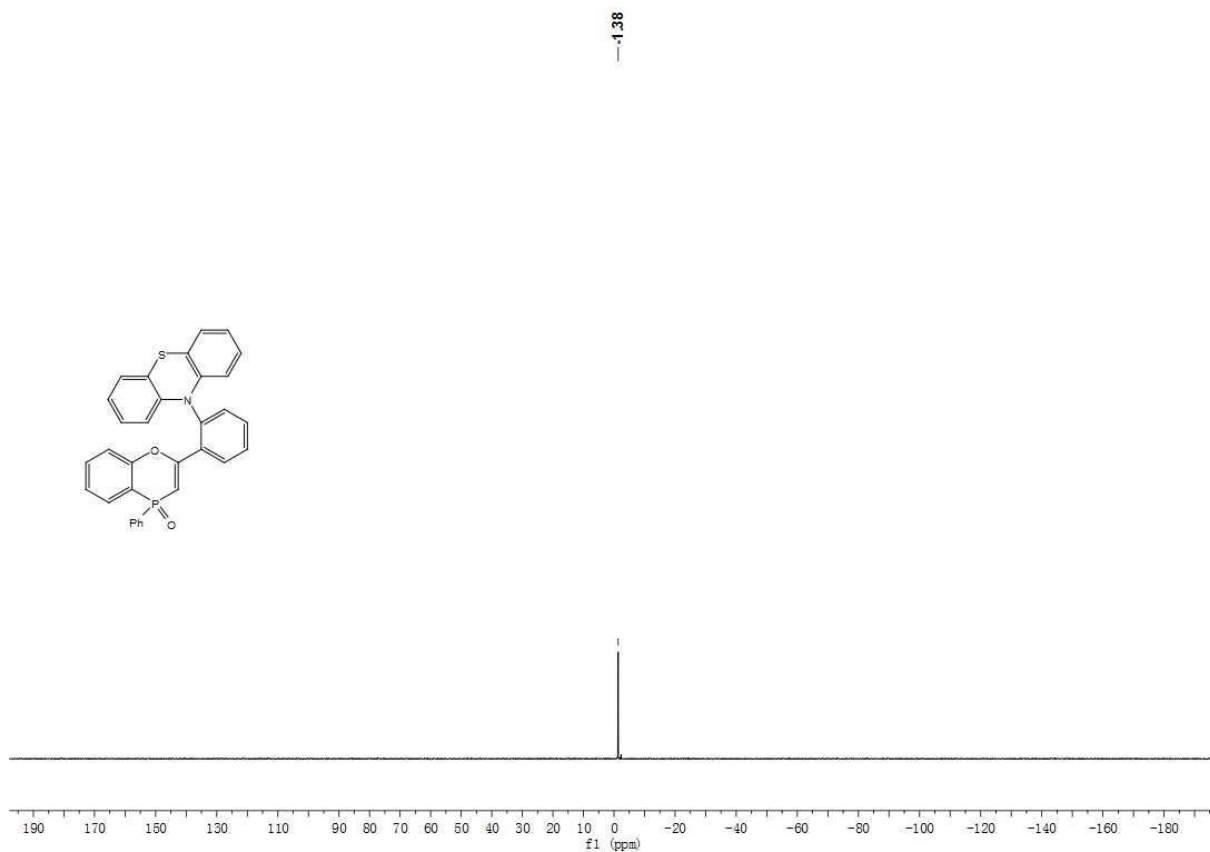

$^{31}\text{P}$  NMR ( $\text{CDCl}_3$ -*d*) of **4j**

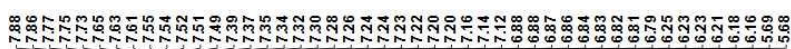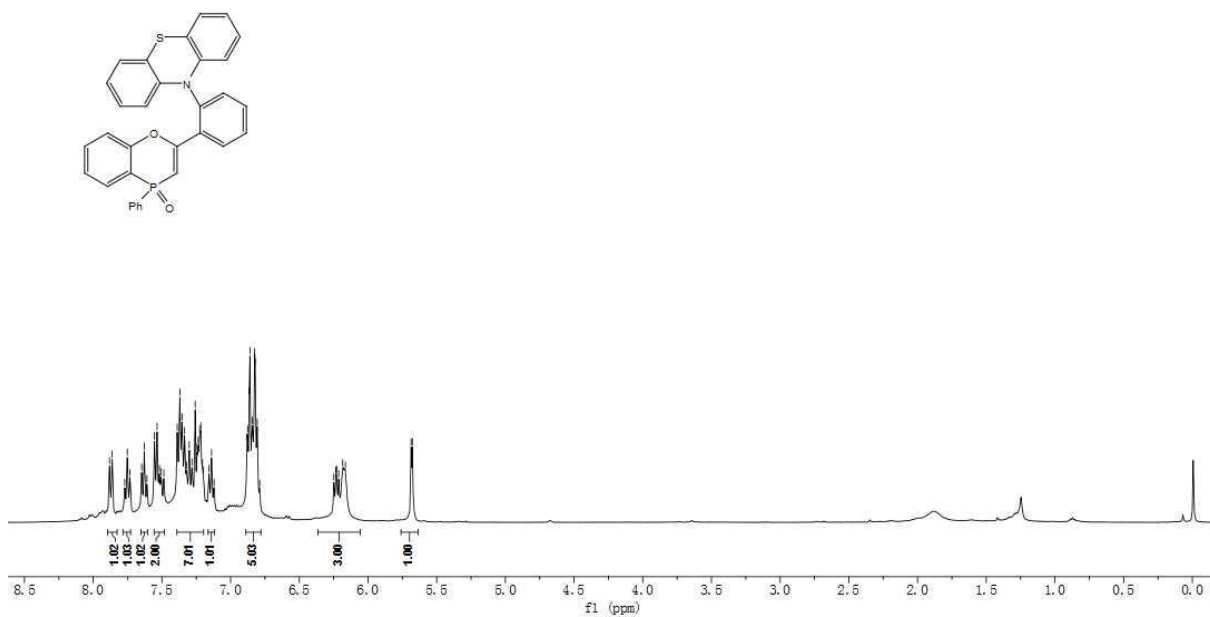

$^1\text{H}$  NMR ( $\text{CDCl}_3$ -*d*) of **4j**

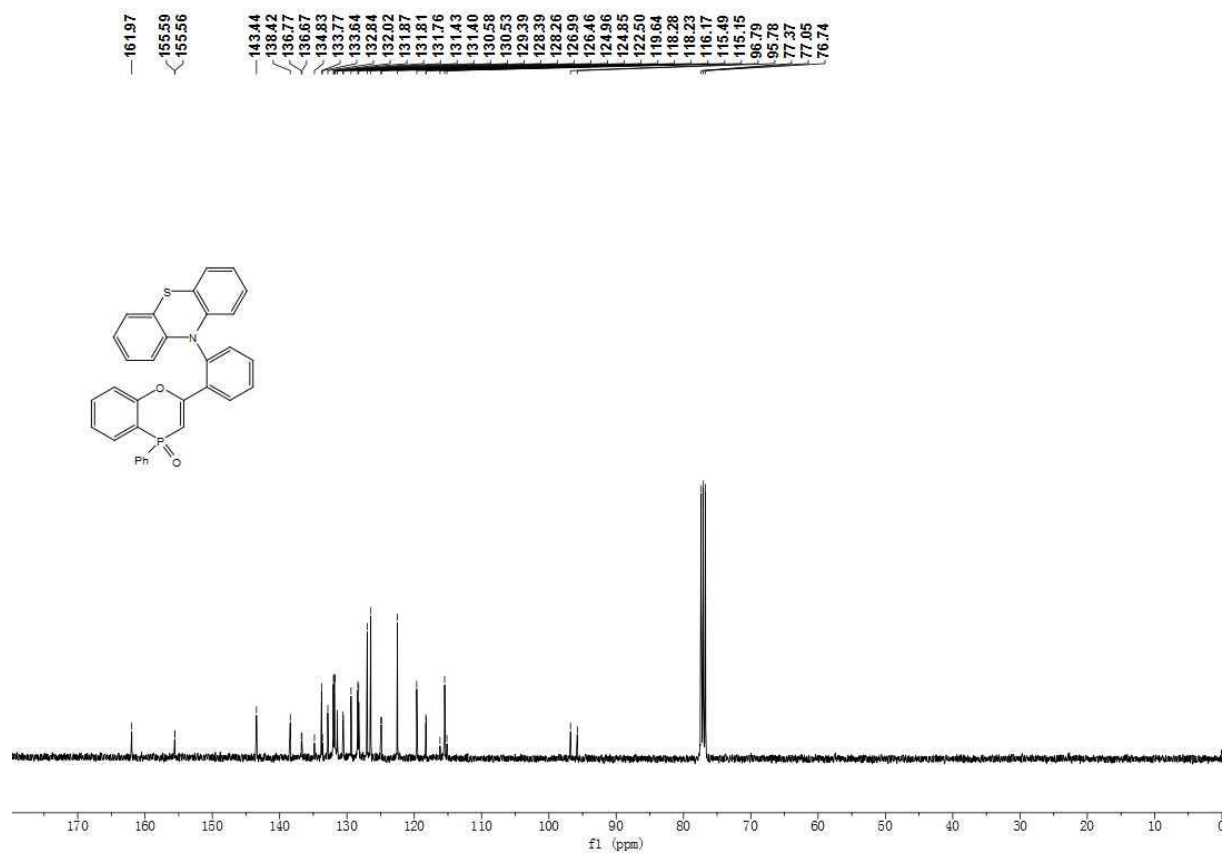

$^{13}\text{C}$  NMR ( $\text{CDCl}_3\text{-}d$ ) of **4j**

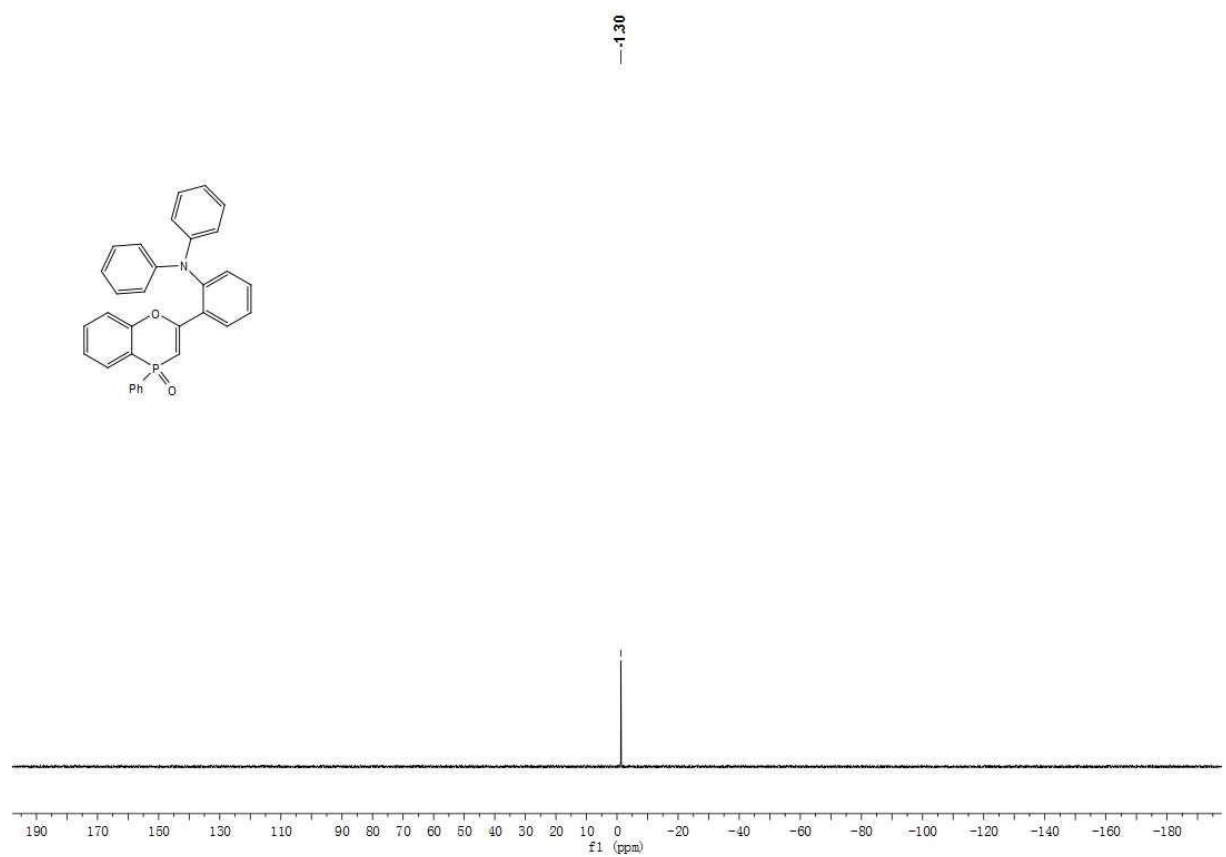

$^{31}\text{P}$  NMR ( $\text{CDCl}_3\text{-}d$ ) of **4k**

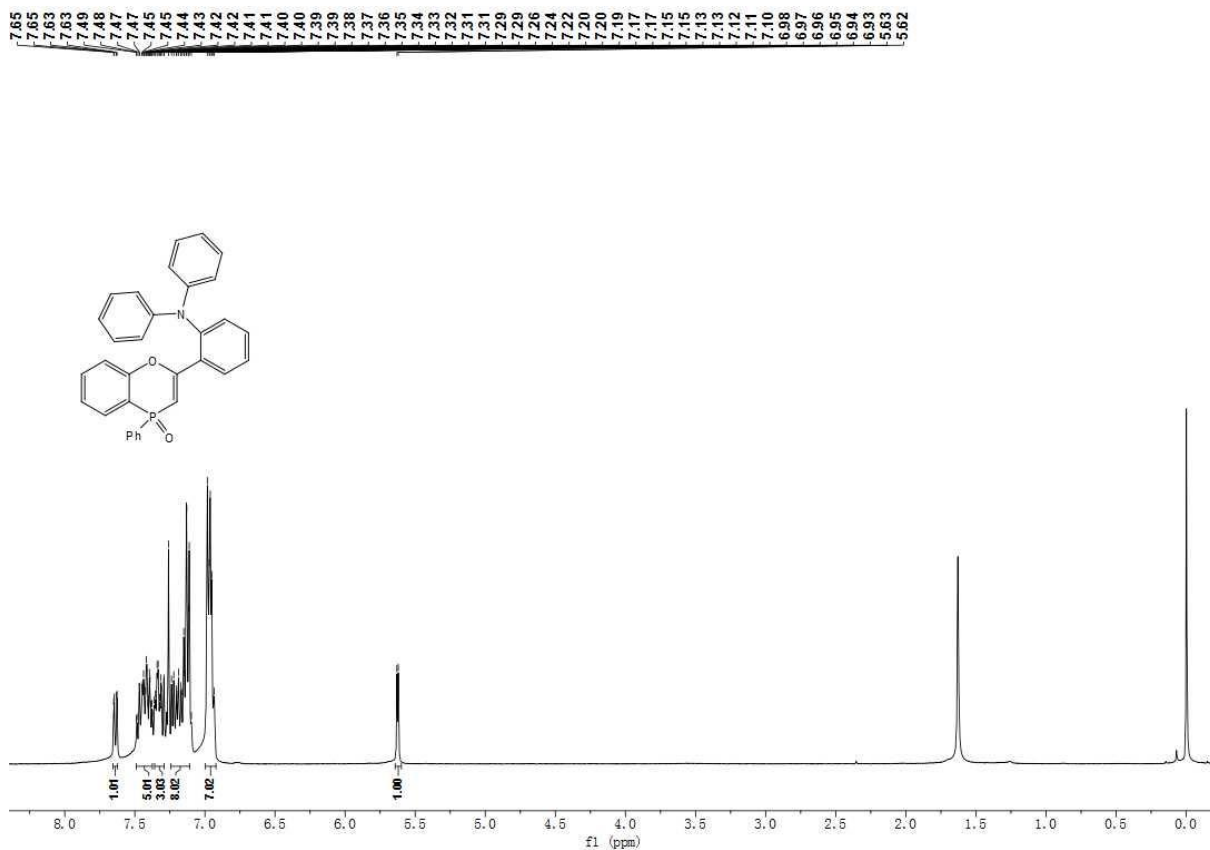

$^1\text{H}$  NMR ( $\text{CDCl}_3-d$ ) of **4k**

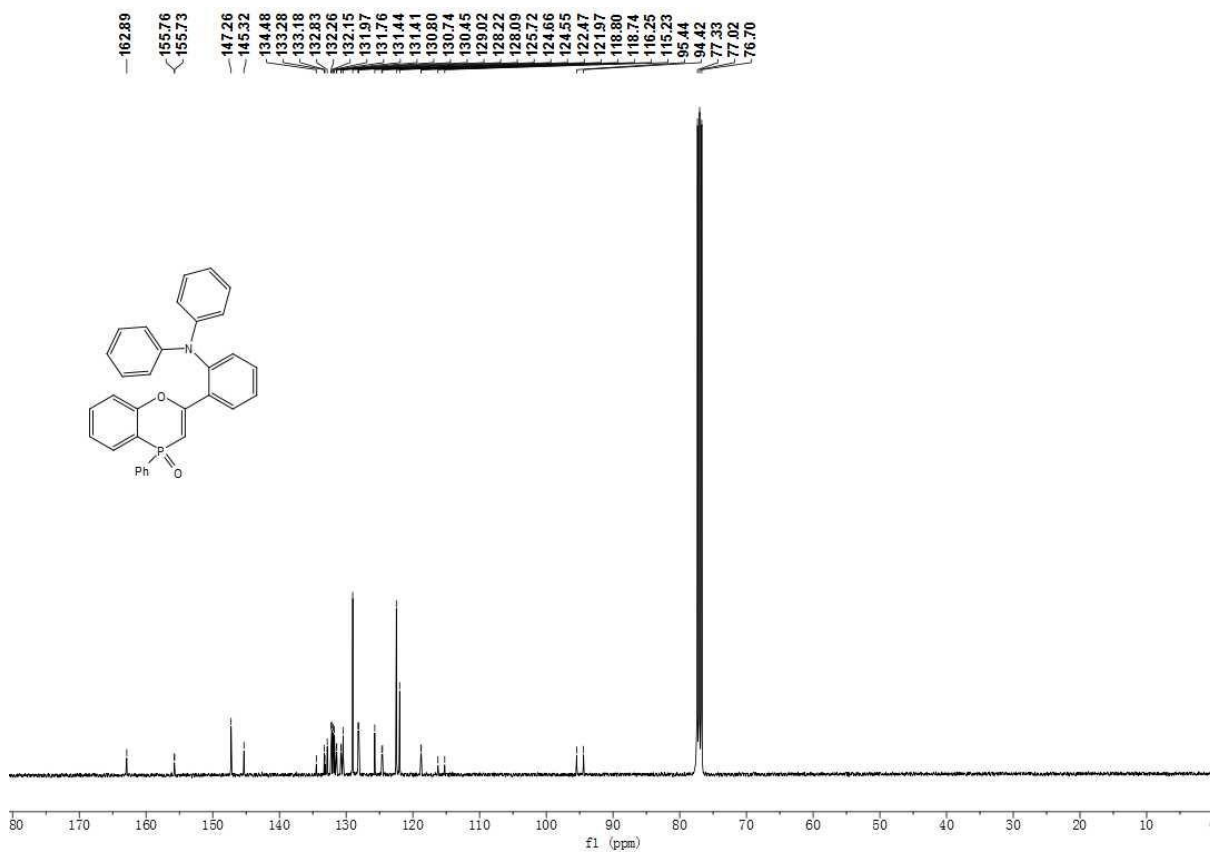

$^{13}\text{C}$  NMR ( $\text{CDCl}_3-d$ ) of **4k**

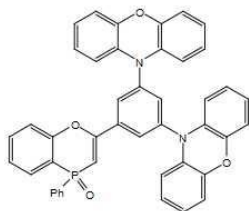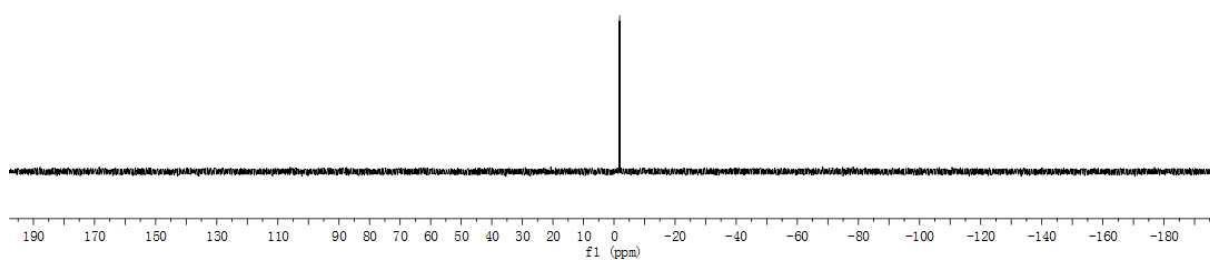

$^{31}\text{P}$  NMR ( $\text{CDCl}_3\text{-}d$ ) of **4m**

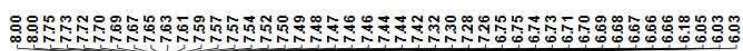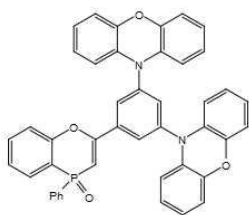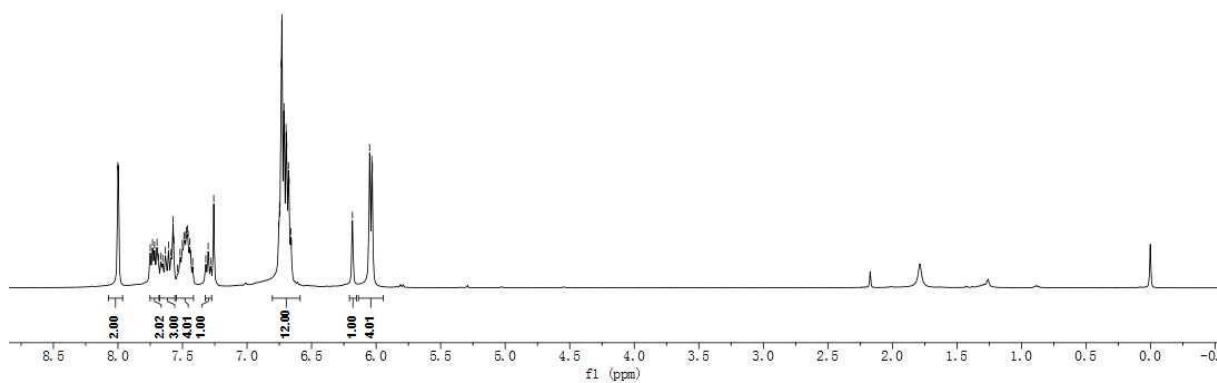

$^1\text{H}$  NMR ( $\text{CDCl}_3\text{-}d$ ) of **4m**

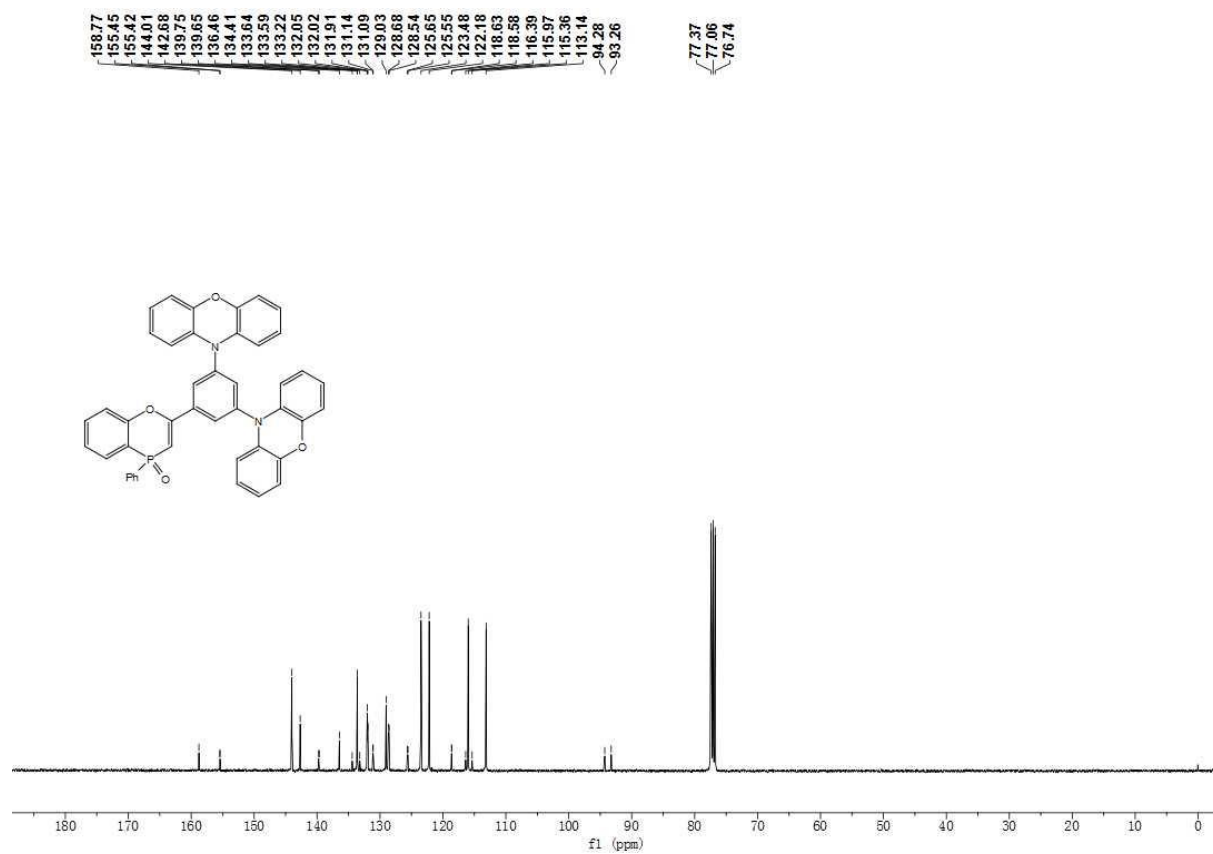

$^{13}\text{C}$  NMR ( $\text{CDCl}_3-d$ ) of **4m**

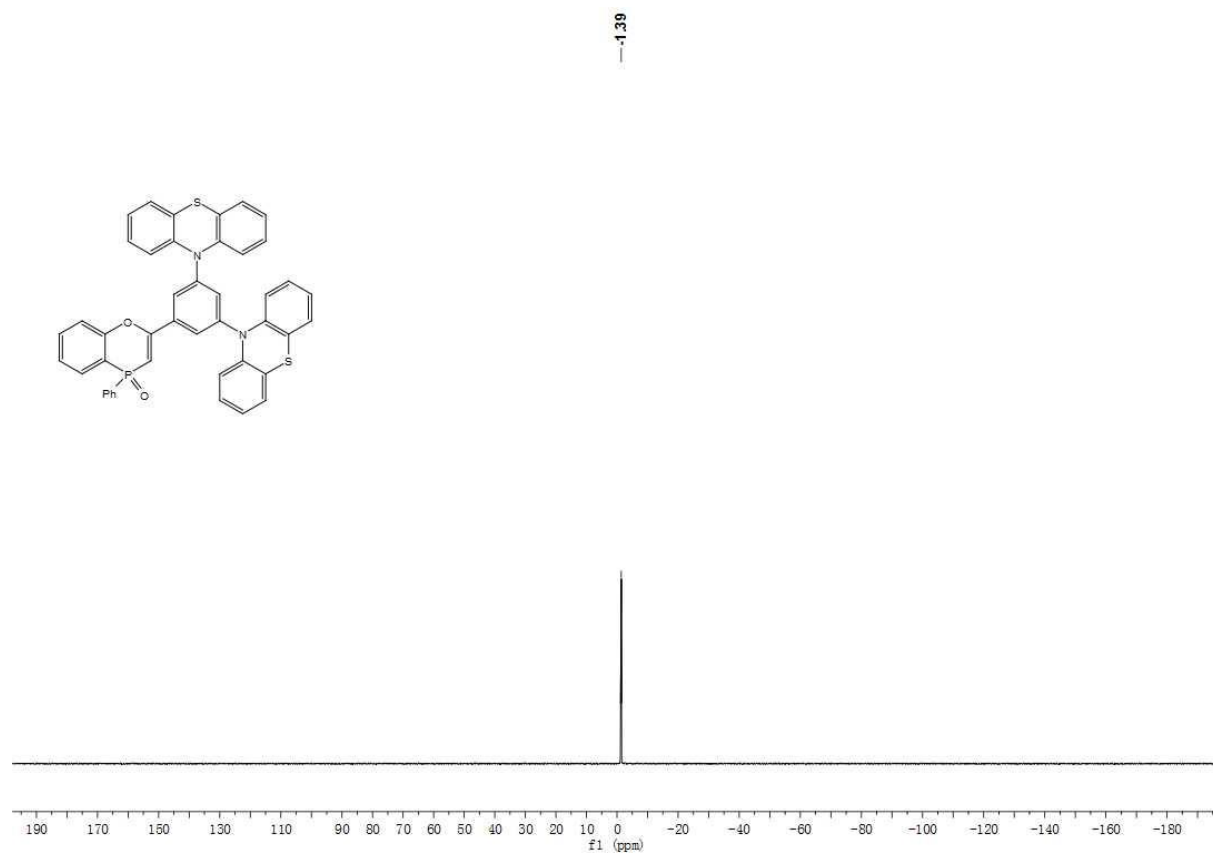

$^{31}\text{P}$  NMR ( $\text{CDCl}_3-d$ ) of **4n**

7.78  
7.77  
7.75  
7.73  
7.72  
7.70  
7.68  
7.66  
7.64  
7.62  
7.61  
7.59  
7.57  
7.52  
7.50  
7.49  
7.48  
7.47  
7.46  
7.45  
7.44  
7.44  
7.36  
7.36  
7.35  
7.35  
7.33  
7.33  
7.30  
7.28  
7.27  
7.26  
7.19  
7.17  
7.08  
7.06  
7.04  
6.99  
6.97  
6.95  
6.66  
6.64  
6.08

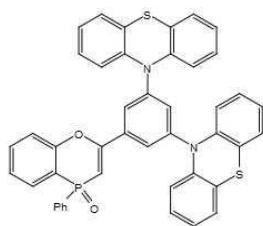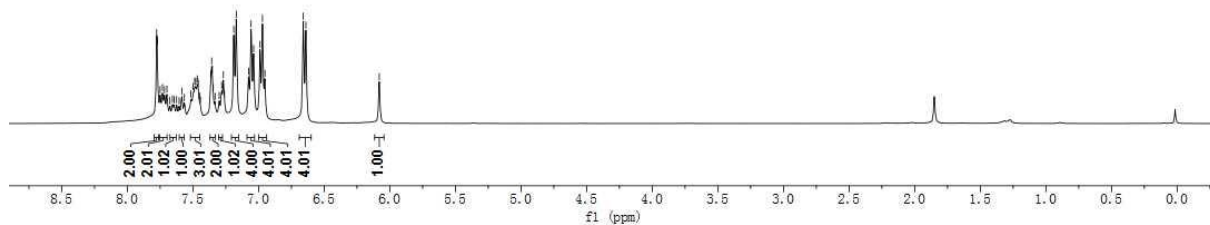

$^1\text{H}$  NMR ( $\text{CDCl}_3-d$ ) of **4n**

159.75  
155.45  
155.42  
145.08  
143.07  
137.81  
137.71  
134.66  
133.49  
132.02  
131.91  
131.06  
131.01  
128.62  
128.49  
127.63  
127.24  
126.95  
125.46  
125.35  
124.60  
123.98  
121.87  
119.14  
118.54  
118.49  
116.47  
115.44  
93.47  
92.43  
77.38  
77.06  
76.75

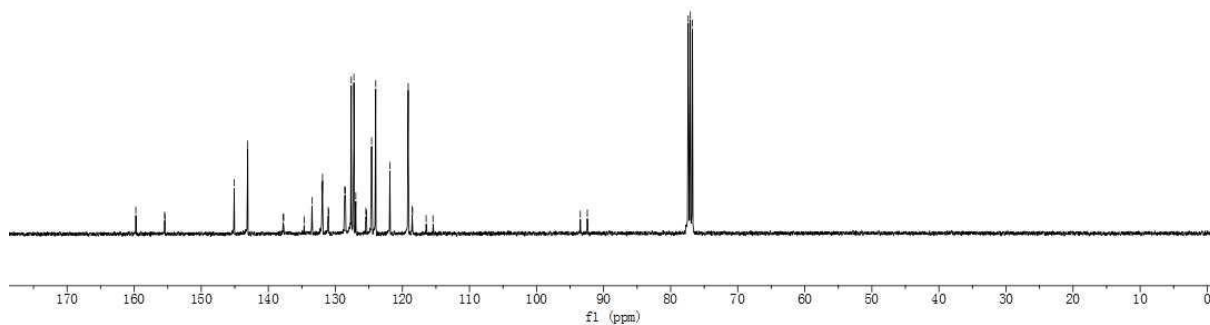

$^{13}\text{C}$  NMR ( $\text{CDCl}_3-d$ ) of **4n**

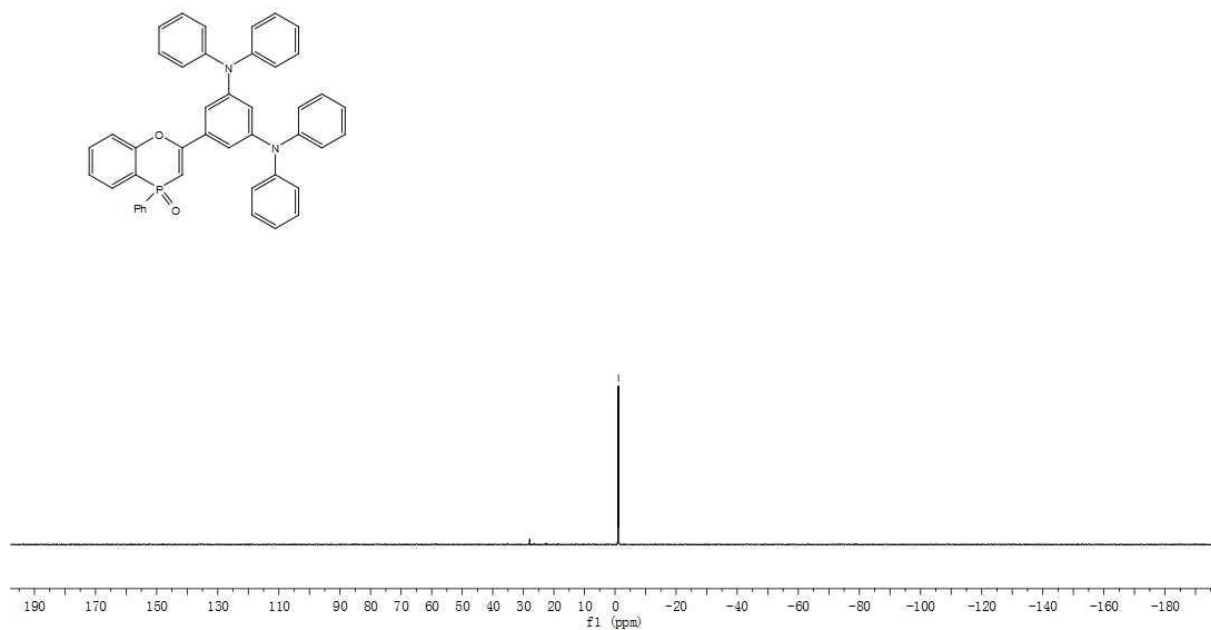

$^{31}\text{P}$  NMR (CDCl<sub>3</sub>-d) of **4o**

7.86  
7.85  
7.84  
7.83  
7.81  
7.81  
7.58  
7.56  
7.54  
7.53  
7.49  
7.47  
7.45  
7.44  
7.43  
7.42  
7.41  
7.40  
7.39  
7.26  
7.23  
7.21  
7.19  
7.16  
7.15  
7.13  
7.13  
7.11  
7.07  
7.06  
7.05  
7.00  
6.98  
6.98  
6.89  
6.89  
6.88  
5.74  
5.73

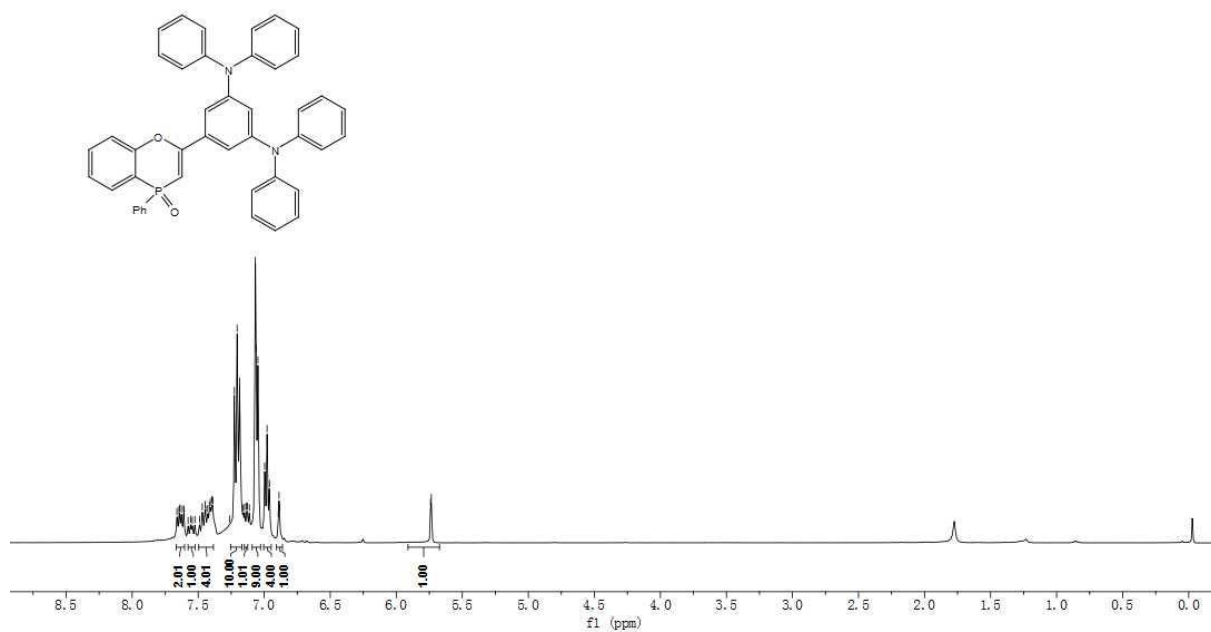

$^1\text{H}$  NMR (CDCl<sub>3</sub>-d) of **4o**



161.39  
155.45  
155.42  
149.07  
147.06  
135.76  
135.66  
135.02  
133.83  
133.19  
132.02  
131.91  
131.72  
131.89  
130.93  
130.87  
129.35  
128.49  
128.36  
125.13  
125.02  
124.39  
123.35  
120.67  
118.52  
118.47  
116.42  
115.40  
115.06  
92.19  
91.15  
77.38  
77.06  
76.75

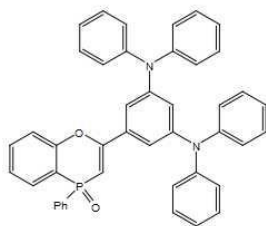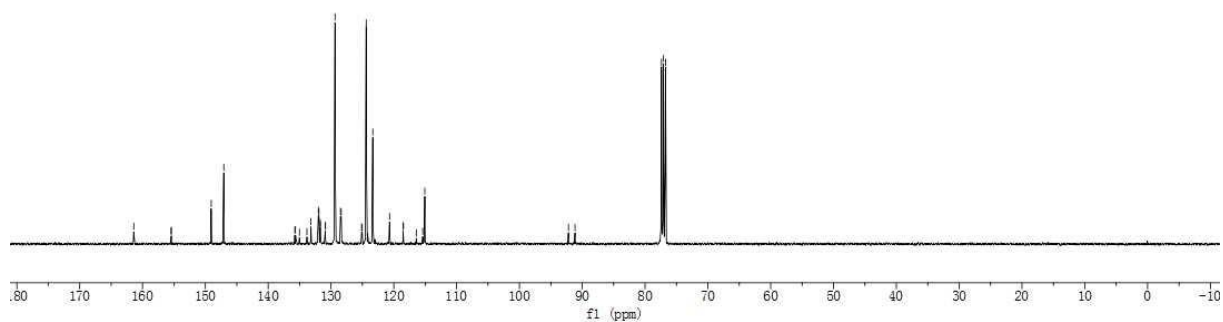

$^{13}\text{C}$  NMR ( $\text{CDCl}_3\text{-}d$ ) of **4o**

-1.49

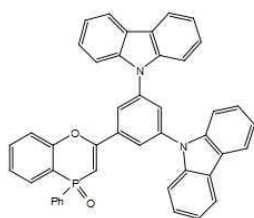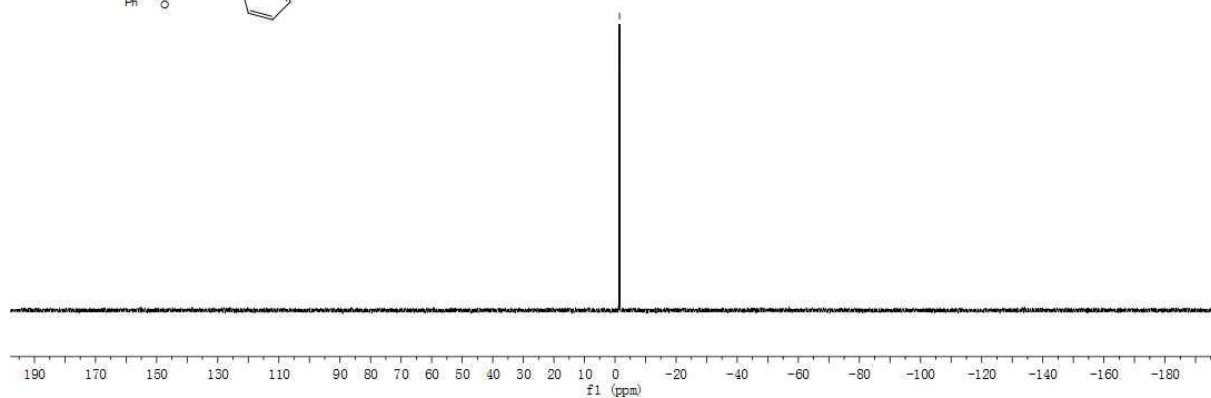

$^{31}\text{P}$  NMR ( $\text{CDCl}_3\text{-}d$ ) of **4p**

8.21  
8.19  
8.17  
7.98  
7.97  
7.97  
7.78  
7.77  
7.76  
7.75  
7.73  
7.72  
7.72  
7.70  
7.69  
7.69  
7.67  
7.67  
7.62  
7.62  
7.59  
7.57  
7.52  
7.52  
7.51  
7.49  
7.47  
7.41  
7.41  
7.40  
7.39  
7.37  
7.35  
7.33  
7.31  
7.29  
7.26  
6.28

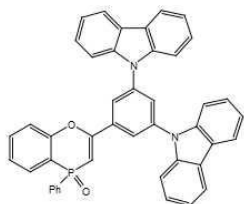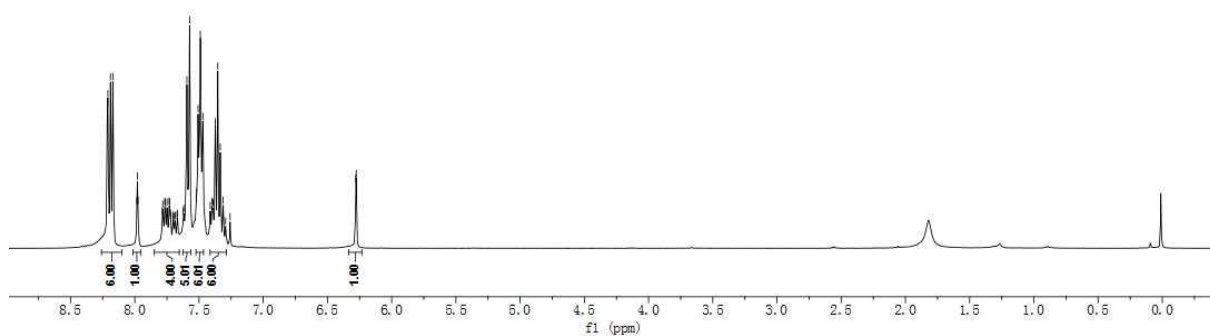

$^1\text{H}$  NMR ( $\text{CDCl}_3\text{-}d$ ) of **4p**

159.52  
155.51  
155.48  
140.42  
140.16  
137.38  
137.28  
134.47  
133.66  
133.27  
132.06  
132.02  
131.91  
131.15  
131.10  
128.70  
128.57  
127.31  
126.46  
125.66  
125.56  
123.82  
123.37  
120.78  
120.65  
118.61  
118.55  
118.43  
115.40  
109.34  
94.25  
93.22  
77.38  
77.06  
76.74

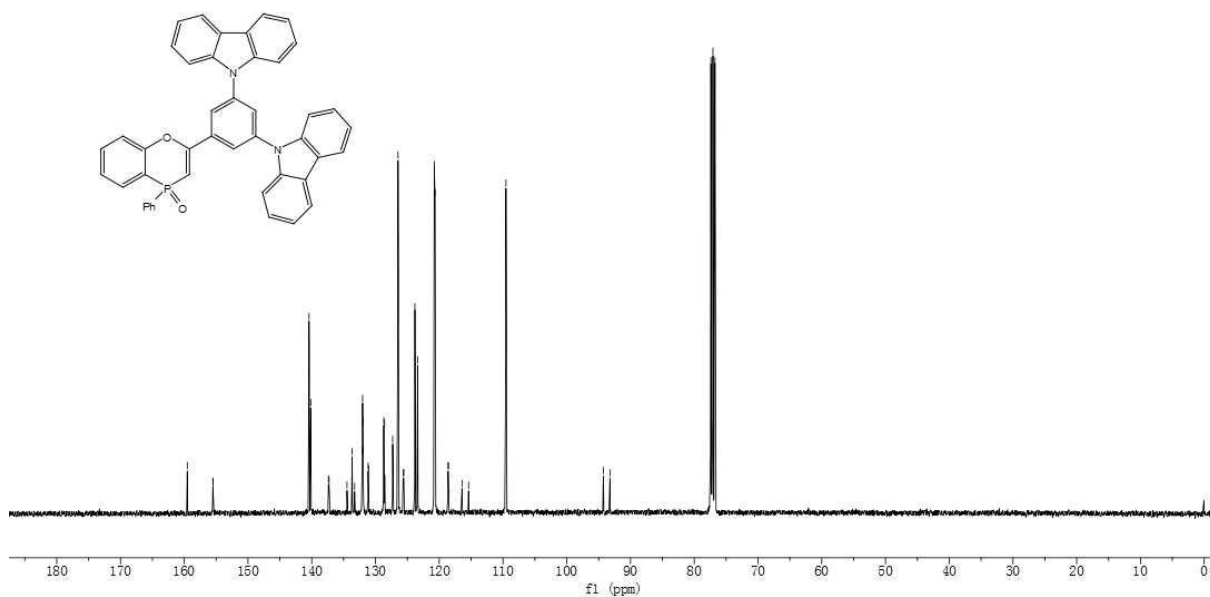

$^{13}\text{C}$  NMR ( $\text{CDCl}_3\text{-}d$ ) of **4p**

8. X-ray crystal structures of **4e**, **4i** and **4k**.

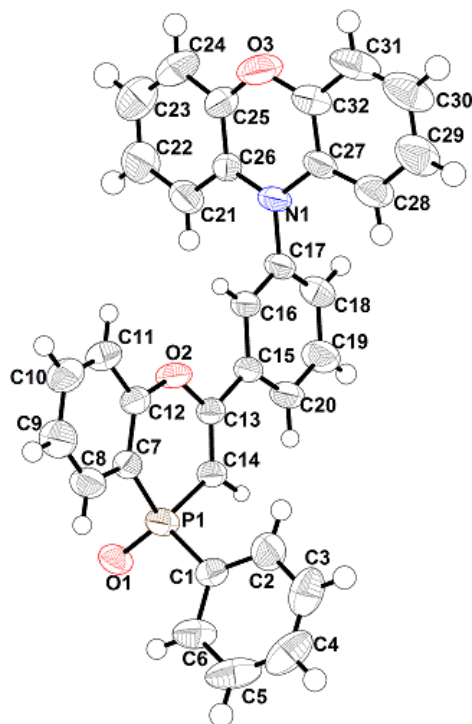

**Figure s10.** Crystal data and structure refinement for **4e**. CCDC reference number: 2014047

**Table s2** Crystal data and structure refinement for **4e**.

|                                    |                                                                   |
|------------------------------------|-------------------------------------------------------------------|
| Identification code                | 4e                                                                |
| Empirical formula                  | C <sub>33</sub> H <sub>23</sub> Cl <sub>2</sub> NO <sub>3</sub> P |
| Formula weight                     | 583.39                                                            |
| Temperature/K                      | 296.15                                                            |
| Crystal system                     | triclinic                                                         |
| Space group                        | P-1                                                               |
| a/Å                                | 8.8411(17)                                                        |
| b/Å                                | 12.359(2)                                                         |
| c/Å                                | 14.778(3)                                                         |
| α/°                                | 97.562(4)                                                         |
| β/°                                | 107.094(3)                                                        |
| γ/°                                | 107.232(3)                                                        |
| Volume/Å <sup>3</sup>              | 1431.3(5)                                                         |
| Z                                  | 2                                                                 |
| ρ <sub>calc</sub> /cm <sup>3</sup> | 1.354                                                             |
| μ/mm <sup>-1</sup>                 | 0.318                                                             |
| F(000)                             | 602.0                                                             |
| Crystal size/mm <sup>3</sup>       | 0.02 × 0.02 × 0.01                                                |
| Radiation                          | MoKα (λ = 0.71073)                                                |
| 2θ range for data collection/°     | 4.962 to 55.234                                                   |
| Index ranges                       | -11 ≤ h ≤ 11, -15 ≤ k ≤ 16, -15 ≤ l ≤ 18                          |
| Reflections collected              | 8694                                                              |

|                                                |                                                                  |
|------------------------------------------------|------------------------------------------------------------------|
| Independent reflections                        | 6224 [ $R_{\text{int}} = 0.0208$ , $R_{\text{sigma}} = 0.0507$ ] |
| Data/restraints/parameters                     | 6224/26/379                                                      |
| Goodness-of-fit on $F^2$                       | 1.025                                                            |
| Final R indexes [ $I \geq 2\sigma(I)$ ]        | $R_1 = 0.0673$ , $wR_2 = 0.1745$                                 |
| Final R indexes [all data]                     | $R_1 = 0.1078$ , $wR_2 = 0.2039$                                 |
| Largest diff. peak/hole / $e \text{ \AA}^{-3}$ | 0.48/-0.56                                                       |

**Table s3 Bond Lengths for 4e.**

| Atom | Atom | Length/ $\text{\AA}$ | Atom | Atom | Length/ $\text{\AA}$ |
|------|------|----------------------|------|------|----------------------|
| P1   | C14  | 1.753(3)             | C1   | C2   | 1.389(5)             |
| P1   | C7   | 1.787(3)             | O3   | C25  | 1.385(4)             |
| P1   | O1   | 1.483(2)             | O3   | C32  | 1.373(4)             |
| P1   | C1   | 1.798(3)             | C25  | C26  | 1.390(4)             |
| O2   | C13  | 1.366(3)             | C25  | C24  | 1.361(5)             |
| O2   | C12  | 1.381(3)             | C21  | C26  | 1.379(4)             |
| C13  | C14  | 1.334(4)             | C21  | C22  | 1.389(5)             |
| C13  | C15  | 1.489(4)             | C27  | C32  | 1.393(4)             |
| C12  | C7   | 1.388(4)             | C27  | C28  | 1.381(5)             |
| C12  | C11  | 1.393(4)             | C32  | C31  | 1.377(5)             |
| C7   | C8   | 1.399(4)             | C28  | C29  | 1.385(5)             |
| C20  | C15  | 1.392(4)             | C31  | C30  | 1.374(6)             |
| C20  | C19  | 1.372(4)             | C29  | C30  | 1.365(6)             |
| C16  | C17  | 1.375(4)             | C24  | C23  | 1.373(6)             |
| C16  | C15  | 1.393(4)             | C22  | C23  | 1.373(6)             |
| C17  | C18  | 1.375(5)             | C6   | C5   | 1.388(5)             |
| C17  | N1   | 1.437(4)             | C2   | C3   | 1.385(5)             |
| C19  | C18  | 1.387(5)             | C5   | C4   | 1.355(7)             |
| C11  | C10  | 1.361(5)             | C3   | C4   | 1.356(7)             |
| C8   | C9   | 1.360(5)             | C11  | C9BA | 1.692(11)            |
| C10  | C9   | 1.384(5)             | C12  | C9BA | 1.816(12)            |
| N1   | C26  | 1.402(4)             | C1   | C6   | 1.376(4)             |
| N1   | C27  | 1.394(4)             |      |      |                      |

**Table s4 Bond Angles for 4e.**

| Atom | Atom | Atom | Angle/ $^\circ$ | Atom | Atom | Atom | Angle/ $^\circ$ |
|------|------|------|-----------------|------|------|------|-----------------|
| C14  | P1   | C7   | 100.32(13)      | C27  | N1   | C26  | 119.4(2)        |
| C14  | P1   | C1   | 107.36(14)      | C6   | C1   | P1   | 120.2(3)        |
| C7   | P1   | C1   | 108.26(13)      | C6   | C1   | C2   | 117.7(3)        |
| O1   | P1   | C14  | 115.32(13)      | C2   | C1   | P1   | 122.1(2)        |
| O1   | P1   | C7   | 113.79(13)      | C32  | O3   | C25  | 117.8(3)        |

|     |     |     |            |      |      |      |           |
|-----|-----|-----|------------|------|------|------|-----------|
| O1  | P1  | C1  | 111.04(13) | O3   | C25  | C26  | 121.4(3)  |
| C13 | O2  | C12 | 123.7(2)   | C24  | C25  | O3   | 116.8(3)  |
| O2  | C13 | C15 | 110.0(2)   | C24  | C25  | C26  | 121.8(4)  |
| C14 | C13 | O2  | 124.2(3)   | C26  | C21  | C22  | 120.4(4)  |
| C14 | C13 | C15 | 125.7(3)   | C25  | C26  | N1   | 118.9(3)  |
| O2  | C12 | C7  | 124.5(3)   | C21  | C26  | N1   | 123.0(3)  |
| O2  | C12 | C11 | 114.3(3)   | C21  | C26  | C25  | 118.1(3)  |
| C7  | C12 | C11 | 121.2(3)   | C32  | C27  | N1   | 118.8(3)  |
| C13 | C14 | P1  | 124.9(2)   | C28  | C27  | N1   | 122.9(3)  |
| C12 | C7  | P1  | 121.3(2)   | C28  | C27  | C32  | 118.2(3)  |
| C12 | C7  | C8  | 117.7(3)   | O3   | C32  | C27  | 121.8(3)  |
| C8  | C7  | P1  | 120.9(2)   | O3   | C32  | C31  | 117.5(3)  |
| C19 | C20 | C15 | 120.5(3)   | C31  | C32  | C27  | 120.6(4)  |
| C17 | C16 | C15 | 120.3(3)   | C27  | C28  | C29  | 120.6(4)  |
| C16 | C17 | C18 | 120.7(3)   | C30  | C31  | C32  | 120.3(4)  |
| C16 | C17 | N1  | 118.9(3)   | C30  | C29  | C28  | 120.5(4)  |
| C18 | C17 | N1  | 120.3(3)   | C25  | C24  | C23  | 119.6(4)  |
| C20 | C15 | C13 | 120.7(2)   | C29  | C30  | C31  | 119.7(4)  |
| C20 | C15 | C16 | 118.6(3)   | C23  | C22  | C21  | 119.9(4)  |
| C16 | C15 | C13 | 120.7(3)   | C22  | C23  | C24  | 120.2(4)  |
| C20 | C19 | C18 | 120.4(3)   | C1   | C6   | C5   | 120.5(4)  |
| C17 | C18 | C19 | 119.3(3)   | C3   | C2   | C1   | 120.8(4)  |
| C10 | C11 | C12 | 119.2(3)   | C4   | C5   | C6   | 120.9(4)  |
| C9  | C8  | C7  | 121.0(3)   | C4   | C3   | C2   | 120.5(4)  |
| C11 | C10 | C9  | 120.6(3)   | C5   | C4   | C3   | 119.6(4)  |
| C8  | C9  | C10 | 120.2(3)   | C11  | C9BA | C12  | 72.2(7)   |
| C26 | N1  | C17 | 119.3(2)   | C12A | C9BA | C11A | 126.0(10) |
| C27 | N1  | C17 | 120.9(2)   |      |      |      |           |

---

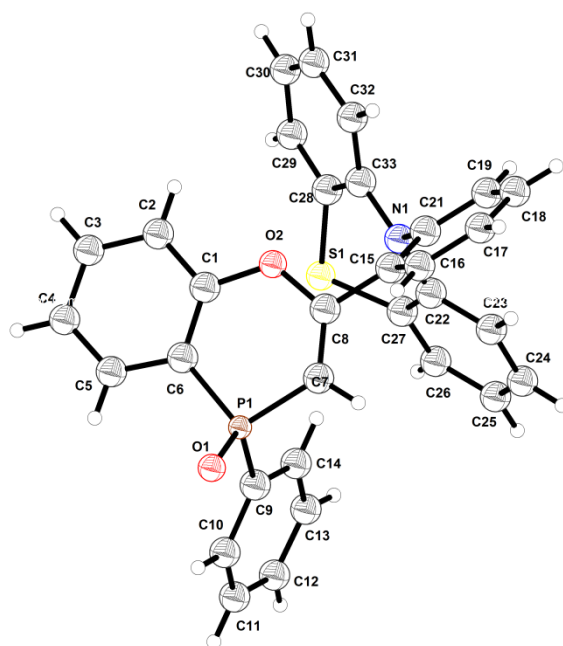

**Figure s11.** Crystal data and structure refinement for **4j**. CCDC reference number: 2014049

**Table s5 Crystal data and structure refinement for 4j.**

|                                             |                                                               |
|---------------------------------------------|---------------------------------------------------------------|
| Identification code                         | 200104HUANGHY_0m                                              |
| Empirical formula                           | C <sub>32</sub> H <sub>22</sub> NO <sub>2</sub> PS            |
| Formula weight                              | 515.577                                                       |
| Temperature/K                               | 296.15                                                        |
| Crystal system                              | orthorhombic                                                  |
| Space group                                 | Pbca                                                          |
| a/Å                                         | 21.166(4)                                                     |
| b/Å                                         | 16.659(3)                                                     |
| c/Å                                         | 14.675(3)                                                     |
| α/°                                         | 90                                                            |
| β/°                                         | 90                                                            |
| γ/°                                         | 90                                                            |
| Volume/Å <sup>3</sup>                       | 5174.7(17)                                                    |
| Z                                           | 8                                                             |
| ρ <sub>calc</sub> /g/cm <sup>3</sup>        | 1.324                                                         |
| μ/mm <sup>-1</sup>                          | 0.218                                                         |
| F(000)                                      | 2146.7                                                        |
| Crystal size/mm <sup>3</sup>                | 0.03 × 0.025 × 0.02                                           |
| Radiation                                   | Mo Kα (λ = 0.71073)                                           |
| 2θ range for data collection/°              | 4.16 to 55.04                                                 |
| Index ranges                                | -26 ≤ h ≤ 25, -19 ≤ k ≤ 21, -18 ≤ l ≤ 19                      |
| Reflections collected                       | 29589                                                         |
| Independent reflections                     | 5903 [R <sub>int</sub> = 0.0668, R <sub>sigma</sub> = 0.0580] |
| Data/restraints/parameters                  | 5903/0/334                                                    |
| Goodness-of-fit on F <sup>2</sup>           | 1.095                                                         |
| Final R indexes [I ≥ 2σ (I)]                | R <sub>1</sub> = 0.0551, wR <sub>2</sub> = 0.1224             |
| Final R indexes [all data]                  | R <sub>1</sub> = 0.1163, wR <sub>2</sub> = 0.1603             |
| Largest diff. peak/hole / e Å <sup>-3</sup> | 0.59/-0.58                                                    |

**Table s6 Bond Lengths for 4j.**

| Atom | Atom | Length/Å | Atom | Atom | Length/Å |
|------|------|----------|------|------|----------|
| P1   | O1   | 1.480(2) | C1   | C2   | 1.393(4) |
| P1   | C6   | 1.786(3) | C9   | C14  | 1.392(4) |
| P1   | C7   | 1.764(3) | C9   | C10  | 1.388(4) |
| P1   | C9   | 1.800(3) | C16  | C17  | 1.383(4) |
| S1   | C28  | 1.775(3) | C28  | C29  | 1.374(5) |
| S1   | C27  | 1.751(4) | C3   | C2   | 1.372(5) |
| O2   | C8   | 1.374(3) | C3   | C4   | 1.385(5) |
| O2   | C1   | 1.382(4) | C17  | C18  | 1.370(4) |
| N1   | C22  | 1.425(4) | C5   | C4   | 1.377(5) |
| N1   | C21  | 1.439(3) | C27  | C26  | 1.384(5) |
| N1   | C33  | 1.415(4) | C18  | C19  | 1.382(4) |
| C8   | C15  | 1.480(4) | C14  | C13  | 1.391(5) |
| C8   | C7   | 1.324(4) | C10  | C11  | 1.382(5) |
| C15  | C21  | 1.395(4) | C23  | C24  | 1.377(5) |
| C15  | C16  | 1.384(4) | C32  | C31  | 1.381(5) |
| C6   | C1   | 1.392(4) | C13  | C12  | 1.365(5) |
| C6   | C5   | 1.395(4) | C29  | C30  | 1.386(5) |
| C22  | C27  | 1.401(4) | C31  | C30  | 1.368(5) |
| C22  | C23  | 1.390(4) | C12  | C11  | 1.375(6) |
| C21  | C19  | 1.389(4) | C26  | C25  | 1.372(5) |
| C33  | C28  | 1.403(4) | C24  | C25  | 1.367(5) |
| C33  | C32  | 1.382(4) |      |      |          |

**Table s7 Bond Angles for 4j.**

| Atom | Atom | Atom | Angle/°    | Atom | Atom | Atom | Angle/°  |
|------|------|------|------------|------|------|------|----------|
| O1   | P1   | C6   | 114.25(14) | O2   | C1   | C6   | 124.2(3) |
| O1   | P1   | C7   | 116.67(14) | O2   | C1   | C2   | 114.2(3) |
| O1   | P1   | C9   | 110.97(14) | C6   | C1   | C2   | 121.6(3) |
| C6   | P1   | C9   | 106.71(14) | C8   | C7   | P1   | 125.1(2) |
| C7   | P1   | C6   | 99.67(15)  | C14  | C9   | P1   | 121.7(2) |
| C7   | P1   | C9   | 107.59(14) | C10  | C9   | P1   | 119.2(2) |
| C27  | S1   | C28  | 99.23(15)  | C10  | C9   | C14  | 119.1(3) |
| C8   | O2   | C1   | 122.6(2)   | C17  | C16  | C15  | 120.7(3) |
| C22  | N1   | C21  | 116.3(2)   | C33  | C28  | S1   | 119.9(3) |
| C33  | N1   | C22  | 122.1(2)   | C29  | C28  | S1   | 118.4(3) |
| C33  | N1   | C21  | 119.0(2)   | C29  | C28  | C33  | 121.2(3) |
| O2   | C8   | C15  | 110.1(2)   | C2   | C3   | C4   | 120.4(3) |

|     |     |     |          |     |     |     |          |
|-----|-----|-----|----------|-----|-----|-----|----------|
| C7  | C8  | O2  | 125.6(3) | C18 | C17 | C16 | 120.2(3) |
| C7  | C8  | C15 | 124.3(3) | C4  | C5  | C6  | 122.1(3) |
| C21 | C15 | C8  | 120.0(2) | C22 | C27 | S1  | 120.8(3) |
| C16 | C15 | C8  | 120.9(3) | C26 | C27 | S1  | 119.2(3) |
| C16 | C15 | C21 | 119.1(3) | C26 | C27 | C22 | 119.8(3) |
| C1  | C6  | P1  | 122.7(2) | C17 | C18 | C19 | 120.0(3) |
| C1  | C6  | C5  | 117.0(3) | C18 | C19 | C21 | 120.4(3) |
| C5  | C6  | P1  | 120.2(2) | C3  | C2  | C1  | 119.5(3) |
| C27 | C22 | N1  | 120.4(3) | C13 | C14 | C9  | 119.8(3) |
| C23 | C22 | N1  | 121.5(3) | C5  | C4  | C3  | 119.4(3) |
| C23 | C22 | C27 | 118.1(3) | C11 | C10 | C9  | 120.3(3) |
| C15 | C21 | N1  | 118.6(2) | C24 | C23 | C22 | 120.8(3) |
| C19 | C21 | N1  | 121.5(3) | C31 | C32 | C33 | 120.7(3) |
| C19 | C21 | C15 | 119.7(3) | C12 | C13 | C14 | 120.3(4) |
| C28 | C33 | N1  | 120.6(3) | C28 | C29 | C30 | 120.2(3) |
| C32 | C33 | N1  | 121.8(3) | C30 | C31 | C32 | 121.4(4) |
| C32 | C33 | C28 | 117.6(3) | C13 | C12 | C11 | 120.5(4) |
| C12 | C11 | C10 | 120.0(4) | C31 | C30 | C29 | 118.8(4) |
| C24 | C25 | C26 | 119.3(4) | C25 | C26 | C27 | 121.0(4) |
| C25 | C24 | C23 | 120.8(4) |     |     |     |          |

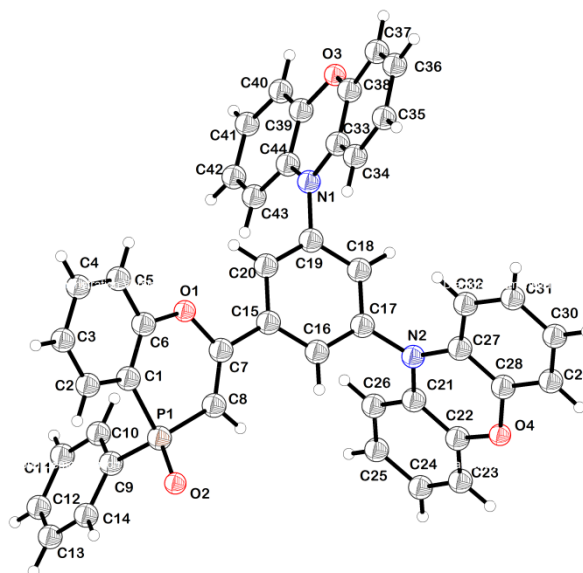

**Figure s12.** Crystal data and structure refinement for **4m**. CCDC reference number: 2014048

**Table s8 Crystal data and structure refinement for 4m.**

|                     |                                                                 |
|---------------------|-----------------------------------------------------------------|
| Identification code | 4m                                                              |
| Empirical formula   | C <sub>44</sub> H <sub>29</sub> N <sub>2</sub> O <sub>4</sub> P |
| Formula weight      | 680.66                                                          |
| Temperature/K       | 296.15                                                          |
| Crystal system      | monoclinic                                                      |



|                                                |                                                               |
|------------------------------------------------|---------------------------------------------------------------|
| Space group                                    | C2/c                                                          |
| a/Å                                            | 27.765(7)                                                     |
| b/Å                                            | 11.840(3)                                                     |
| c/Å                                            | 25.681(7)                                                     |
| $\alpha/^\circ$                                | 90                                                            |
| $\beta/^\circ$                                 | 126.333(4)                                                    |
| $\gamma/^\circ$                                | 90                                                            |
| Volume/Å <sup>3</sup>                          | 6801(3)                                                       |
| Z                                              | 8                                                             |
| $\rho_{\text{calc}}/\text{g/cm}^3$             | 1.330                                                         |
| $\mu/\text{mm}^{-1}$                           | 0.130                                                         |
| F(000)                                         | 2832.0                                                        |
| Crystal size/mm <sup>3</sup>                   | 0.02 × 0.02 × 0.015                                           |
| Radiation                                      | MoK $\alpha$ ( $\lambda = 0.71073$ )                          |
| 2 $\Theta$ range for data collection/ $^\circ$ | 4.708 to 55.294                                               |
| Index ranges                                   | -18 ≤ h ≤ 36, -14 ≤ k ≤ 14, -33 ≤ l ≤ 32                      |
| Reflections collected                          | 20206                                                         |
| Independent reflections                        | 7554 [R <sub>int</sub> = 0.0602, R <sub>sigma</sub> = 0.0808] |
| Data/restraints/parameters                     | 7554/0/460                                                    |
| Goodness-of-fit on F <sup>2</sup>              | 0.991                                                         |
| Final R indexes [I ≥ 2 $\sigma$ (I)]           | R <sub>1</sub> = 0.0551, wR <sub>2</sub> = 0.1120             |
| Final R indexes [all data]                     | R <sub>1</sub> = 0.1290, wR <sub>2</sub> = 0.1406             |
| Largest diff. peak/hole / e Å <sup>-3</sup>    | 0.24/-0.28                                                    |

**Table s9 Bond Lengths for 4m.**

| Atom | Atom | Length/Å   | Atom | Atom | Length/Å |
|------|------|------------|------|------|----------|
| P1   | O2   | 1.4818(16) | C19  | C20  | 1.378(3) |
| P1   | C1   | 1.782(2)   | C19  | C18  | 1.379(3) |
| P1   | C8   | 1.752(2)   | C14  | C13  | 1.370(4) |
| P1   | C9   | 1.795(2)   | C38  | C33  | 1.400(3) |
| O1   | C6   | 1.382(3)   | C38  | C37  | 1.372(4) |
| O1   | C7   | 1.375(3)   | C33  | C34  | 1.372(3) |
| O3   | C39  | 1.380(3)   | C2   | C3   | 1.372(4) |
| O3   | C38  | 1.378(3)   | C27  | C28  | 1.389(4) |
| N1   | C44  | 1.401(3)   | C27  | C32  | 1.375(4) |
| N1   | C19  | 1.441(3)   | C21  | C22  | 1.392(4) |
| N1   | C33  | 1.405(3)   | C21  | C26  | 1.371(4) |
| N2   | C17  | 1.435(3)   | C5   | C4   | 1.369(3) |
| N2   | C27  | 1.405(3)   | C10  | C11  | 1.382(4) |
| N2   | C21  | 1.402(3)   | C3   | C4   | 1.383(4) |
| C6   | C1   | 1.390(3)   | C40  | C41  | 1.373(4) |

|     |     |          |     |     |          |
|-----|-----|----------|-----|-----|----------|
| C6  | C5  | 1.383(3) | C43 | C42 | 1.381(4) |
| C7  | C15 | 1.479(3) | C22 | C23 | 1.358(5) |
| C7  | C8  | 1.336(3) | C12 | C13 | 1.365(4) |
| O4  | C22 | 1.377(4) | C12 | C11 | 1.374(4) |
| O4  | C28 | 1.382(4) | C34 | C35 | 1.385(4) |
| C1  | C2  | 1.393(3) | C37 | C36 | 1.375(4) |
| C15 | C16 | 1.388(3) | C35 | C36 | 1.377(4) |
| C15 | C20 | 1.405(3) | C28 | C29 | 1.391(5) |
| C9  | C14 | 1.391(3) | C26 | C25 | 1.389(4) |
| C9  | C10 | 1.382(3) | C32 | C31 | 1.393(5) |
| C44 | C39 | 1.399(3) | C23 | C24 | 1.360(6) |
| C44 | C43 | 1.374(3) | C41 | C42 | 1.375(4) |
| C16 | C17 | 1.380(3) | C24 | C25 | 1.383(6) |
| C39 | C40 | 1.369(4) | C29 | C30 | 1.363(6) |
| C17 | C18 | 1.383(3) | C31 | C30 | 1.361(6) |

**Table s10 Bond Angles for 4m.**

| Atom | Atom | Atom | Angle/°    | Atom | Atom | Atom | Angle/°  |
|------|------|------|------------|------|------|------|----------|
| O2   | P1   | C1   | 114.68(10) | C19  | C18  | C17  | 119.5(2) |
| O2   | P1   | C8   | 116.66(10) | C13  | C14  | C9   | 120.6(3) |
| O2   | P1   | C9   | 110.47(10) | O3   | C38  | C33  | 121.7(2) |
| C1   | P1   | C9   | 107.50(11) | C37  | C38  | O3   | 117.6(2) |
| C8   | P1   | C1   | 99.80(11)  | C37  | C38  | C33  | 120.8(3) |
| C8   | P1   | C9   | 106.83(11) | C38  | C33  | N1   | 118.9(2) |
| C7   | O1   | C6   | 122.57(17) | C34  | C33  | N1   | 123.0(2) |
| C38  | O3   | C39  | 118.22(18) | C34  | C33  | C38  | 118.1(2) |
| C44  | N1   | C19  | 120.7(2)   | C3   | C2   | C1   | 121.7(3) |
| C44  | N1   | C33  | 119.58(19) | C28  | C27  | N2   | 118.9(3) |
| C33  | N1   | C19  | 118.6(2)   | C32  | C27  | N2   | 123.8(3) |
| C27  | N2   | C17  | 120.8(2)   | C32  | C27  | C28  | 117.3(3) |
| C21  | N2   | C17  | 119.6(2)   | C22  | C21  | N2   | 119.1(3) |
| C21  | N2   | C27  | 119.2(2)   | C26  | C21  | N2   | 122.8(3) |
| O1   | C6   | C1   | 123.9(2)   | C26  | C21  | C22  | 118.1(3) |
| O1   | C6   | C5   | 114.5(2)   | C4   | C5   | C6   | 119.6(2) |
| C5   | C6   | C1   | 121.5(2)   | C11  | C10  | C9   | 120.1(3) |
| O1   | C7   | C15  | 110.23(18) | C2   | C3   | C4   | 119.5(3) |
| C8   | C7   | O1   | 124.4(2)   | C39  | C40  | C41  | 121.0(3) |
| C8   | C7   | C15  | 125.4(2)   | C5   | C4   | C3   | 120.5(3) |
| C22  | O4   | C28  | 118.0(3)   | C44  | C43  | C42  | 121.1(3) |
| C6   | C1   | P1   | 122.32(18) | O4   | C22  | C21  | 121.6(3) |
| C6   | C1   | C2   | 117.2(2)   | C23  | C22  | O4   | 117.1(4) |

|     |     |     |            |     |     |     |          |
|-----|-----|-----|------------|-----|-----|-----|----------|
| C2  | C1  | P1  | 120.43(18) | C23 | C22 | C21 | 121.3(4) |
| C16 | C15 | C7  | 120.05(19) | C13 | C12 | C11 | 120.7(3) |
| C16 | C15 | C20 | 118.9(2)   | C33 | C34 | C35 | 121.2(3) |
| C20 | C15 | C7  | 121.0(2)   | C12 | C13 | C14 | 119.9(3) |
| C7  | C8  | P1  | 125.12(19) | C38 | C37 | C36 | 120.3(3) |
| C14 | C9  | P1  | 118.8(2)   | C12 | C11 | C10 | 119.8(3) |
| C10 | C9  | P1  | 122.24(19) | C36 | C35 | C34 | 120.0(3) |
| C10 | C9  | C14 | 118.9(2)   | O4  | C28 | C27 | 121.7(3) |
| C39 | C44 | N1  | 118.9(2)   | O4  | C28 | C29 | 116.6(4) |
| C43 | C44 | N1  | 123.3(2)   | C27 | C28 | C29 | 121.6(4) |
| C43 | C44 | C39 | 117.8(2)   | C21 | C26 | C25 | 120.3(4) |
| C17 | C16 | C15 | 120.3(2)   | C37 | C36 | C35 | 119.6(3) |
| O3  | C39 | C44 | 121.8(2)   | C27 | C32 | C31 | 121.6(4) |
| C40 | C39 | O3  | 117.5(2)   | C22 | C23 | C24 | 120.9(4) |
| C40 | C39 | C44 | 120.7(3)   | C40 | C41 | C42 | 118.8(3) |
| C16 | C17 | N2  | 119.2(2)   | C41 | C42 | C43 | 120.6(3) |
| C16 | C17 | C18 | 120.5(2)   | C23 | C24 | C25 | 119.0(4) |
| C18 | C17 | N2  | 120.2(2)   | C30 | C29 | C28 | 119.1(4) |
| C20 | C19 | N1  | 120.0(2)   | C30 | C31 | C32 | 119.4(5) |
| C20 | C19 | C18 | 120.7(2)   | C24 | C25 | C26 | 120.3(4) |
| C18 | C19 | N1  | 119.3(2)   | C31 | C30 | C29 | 121.1(5) |
| C19 | C20 | C15 | 120.0(2)   |     |     |     |          |

---
